# Supplementary material for: Sexual assaults in individuals with visual impairment: a cross-sectional study of a Norwegian sample
Source: PubMed Central journal article supplement — BMJ Open. 2018 Jun 9;8(6):e021602. doi: 10.1136/bmjopen-2018-021602 (PMC6009623; doi:10.1136/bmjopen-2018-021602), 2018-06-09
Supplement: bmjopen-2018-021602.draft_revisions.pdf [file bmjopen-2018-021602.draft_revisions.pdf]

# BMJ Open

BMJ Open is committed to open peer review. As part of this commitment we make the peer review history of every article we publish publicly available.

When an article is published we post the peer reviewers' comments and the authors' responses online. We also post the versions of the paper that were used during peer review. These are the versions that the peer review comments apply to.

The versions of the paper that follow are the versions that were submitted during the peer review process. They are not the versions of record or the final published versions. They should not be cited or distributed as the published version of this manuscript.

BMJ Open is an open access journal and the full, final, typeset and author-corrected version of record of the manuscript is available on our site with no access controls, subscription charges or pay-per-view fees (<http://bmjopen.bmj.com>).

If you have any questions on BMJ Open's open peer review process please email [info.bmjopen@bmj.com](mailto:info.bmjopen@bmj.com)

# BMJ Open

## Sexual assaults in individuals with visual impairment: A cross-sectional study of a Norwegian sample

|                               |                                                                                                                                            |
|-------------------------------|--------------------------------------------------------------------------------------------------------------------------------------------|
| Journal:                      | <i>BMJ Open</i>                                                                                                                            |
| Manuscript ID                 | bmjopen-2018-021602                                                                                                                        |
| Article Type:                 | Research                                                                                                                                   |
| Date Submitted by the Author: | 11-Jan-2018                                                                                                                                |
| Complete List of Authors:     | Brunes, Audun; Norwegian Centre for Violence and Traumatic Stress Studies<br>Heir, Trond; Ullevål University Hospital / University of Oslo |
| Keywords:                     | Rape and sexual assault, visual impairment, blindness, self-efficacy, life satisfaction                                                    |
|                               |                                                                                                                                            |

SCHOLARONE™  
Manuscripts

Review only

1  
2  
3 **Sexual assaults in individuals with visual impairment: A cross-**  
4  
5  
6 **sectional study of a Norwegian sample**  
7  
8  
9

10  
11 **Audun Brunes<sup>1</sup>, Trond Heir<sup>1,2</sup>**  
12  
13

14  
15  
16 <sup>1</sup>Norwegian Centre for Violence and Traumatic Stress Studies, PB 181 Nydalen, NO-0409  
17  
18 Oslo, Norway.

19  
20 <sup>2</sup>Institute of Clinical Medicine, Faculty of Medicine, University of Oslo, P.O. Box 1171  
21  
22 Blindern, NO-0318 Oslo, Norway  
23  
24

25  
26 **Corresponding author:**  
27

28  
29 Audun Brunes, Norwegian Centre for Violence and Traumatic Stress Studies,  
30  
31 PB 181 Nydalen, NO-0409 Oslo. E-mail: [audun.brunes@nkvts.no](mailto:audun.brunes@nkvts.no). Phone: +47 97578629  
32  
33

34  
35 Word count excluding title page: 3320  
36

37 Abstract: 274  
38

39 References: 39  
40

41 Figures: 1  
42

43 Tables: 2  
44  
45  
46  
47  
48  
49  
50  
51  
52  
53  
54  
55  
56  
57  
58  
59  
60

## ABSTRACT

**Objective:** To examine the prevalence of sexual assaults among individuals with visual impairment (VI) compared to the general population, and to investigate the association between sexual assault and outcomes of self-efficacy and life satisfaction.

**Design:** Cross-sectional interview-based study conducted between February and May, 2017.

**Participants:** A probability sample of adults with VI ( $\geq 18$  years) who were members of the Norwegian Association of the Blind and Partially Sighted. A total of 736 (61%) members participated, of whom 55% were of female gender. We obtained norm data for sexual assaults from a representative survey of the general Norwegian population.

**Outcome measures:** Sexual assaults (Life Event Checklist for DSM-5), self-efficacy (General Self Efficacy Scale), and life satisfaction (Cantril's Ladder of Life Satisfaction).

**Results:** The prevalence of sexual assaults (rape, attempted rape, and forced into sexual acts) in the VI population was 17.4% (95% confidence interval (CI): 14.0–21.4) among women and 2.4% (95% CI: 1.2–4.7) among men. For women, the VI population had higher rates of sexual assaults across age strata than the general population. For men, no significant differences were found. In the population of people with VI, the risk of sexual assault was greater in those having other impairments in addition to the vision loss. Individuals with VI who experienced sexual assaults had lower levels of self-efficacy (Adjusted relative risk (ARR): 0.18, 95% CI: 0.05–0.61) and life satisfaction (ARR: 0.31, 95% CI: 0.19–0.50) than others.

**Conclusions:** The risk of experiencing sexual assault appears to be higher in individuals with VI than in the general population. Preventive measures as well as psychosocial care for those who have been exposed are needed.

**Keywords:** blindness; life satisfaction; rape; self-efficacy; sexual assault; visual impairment

### Strengths and limitations of this study

- A large probability sample of people with visual impairments made it possible to address the prevalence of sexual assaults within age groups.
- Use of interview-based assessments with validated instruments and detailed information about characteristics of visual impairment.
- The representativeness of the study sample is questionable as participants were recruited from a membership organization of blind and partially sighted.
- The findings should be interpreted in light of the possible impact of bias due to non-participation, recall and self-disclosure.

## INTRODUCTION

Sexual assault – which is in this study referred to forms of violence such as rape and forced sexual acts – is shown to be a strong determinant of people’s health and well-being.[1-3] Sexual transmittable infections and unwanted pregnancies are common among those who have been sexually assaulted[4] and about half of the reported cases involve physical injury.[5] Sexual assault is largely about power and oppression, and is being viewed today as a social problem with structural and cultural roots.[6] So far, sexual assault research has focused primarily on women,[7] while less is known about other marginalized groups, such as men having sex with men[8] and people with specific impairments.[9, 10]

Visual impairment (VI) is defined as functional restrictions of the visual system.[11] According to the World Health Organization (WHO) categorization system,[12] a diagnosis of VI are set through direct assessments of visual acuity and visual field, and classified into moderate to severe VI, blindness, and undetermined VI. VI is a heterogeneous condition occurring at any point in life, and has a diverse set of causes, severities, and progression rates.[13, 14] Furthermore, the majority of people with VI have other impairments in addition to their vision loss, being closely connected to conditions such as cerebral palsy, multiple sclerosis, diabetes and hearing impairment.[15-17]

There have been published a few observational studies from Europe and the US on the prevalence of sexual assault in people with low vision or blindness.[18-22] In the previous studies, the reported lifetime prevalence of sexual assault or abuse has varied, with estimates ranging between 11% and 30%.[18, 19, 21, 22] The varying estimates may be attributed to a number of methodological factors, but it could also be related to the inclusion of samples with different types and degrees of vision loss. However, limited evidence exist on the extent of sexual assault across subgroups of people with various VI characteristics,[18] and more research is therefore needed.

1  
2  
3 Given the uncertainty about the prevalence of sexual assaults in people with VI and its  
4 possible associations with various VI characteristics, we conducted a cross-sectional study by  
5 including a probability sample of adults with VI. The study had the following three main  
6  
7 aims: (1) to estimate the prevalence of sexual assaults compared to the general population, (2)  
8  
9 to examine the association of sexual assaults with VI-related characteristics, and (3) to  
10  
11 examine the association between sexual assaults and outcomes of self-efficacy and life  
12  
13 satisfaction.  
14  
15  
16  
17  
18  
19

## 20 **METHODS**

### 21 **Visual impairment population**

22  
23 This cross-sectional study comprised adult members ( $\geq 18$  years) of the Norwegian  
24 Association of the Blind and Partially Sighted who had a diagnosis of VI. The organization  
25 has about 10,000 members,[23] encompassing 0.2% of the Norwegian population. To ensure  
26 adequate number of participants in the younger age groups, simple random sampling was  
27 performed within each of the following four age strata: 18–35, 36–50, 51–65, and  $\geq 66$ . Data  
28 were collected through structured telephone interviews in the time period between February 1  
29 and May 31, 2017, by a private survey company. A total of 1216 adults were contacted, and  
30 736 (61%) participated by completing the interview. The online supplement includes a flow  
31 chart of the sample selection (Figure S1) and a detailed description of characteristics within  
32 each degree of VI (Table S1).  
33  
34  
35  
36  
37  
38  
39  
40  
41  
42  
43  
44  
45  
46  
47

### 48 **General population**

49  
50 Norm data were based on the Norwegian Population Study (NorPop), a cross-sectional survey  
51 including a representative sample of adults ( $\geq 18$  years) from the general Norwegian  
52 population.[24] Simple random sampling was conducted based on names and addresses from  
53  
54  
55  
56  
57  
58  
59  
60

1  
2  
3 the Central National Register of Norway, and efforts were made to ensure that the sample  
4 reflected the Norwegian population in terms of age, gender, and geographical location. The  
5 study data were collected by postal questionnaires in the period between 2014 and 2015. Of  
6  
7 the 5500 eligible participants, nine persons had died, 21 were not able to fill out the  
8  
9 questionnaire, and 499 envelopes had non-valid addresses. This resulted in a total of 4971  
10  
11 individuals, and 1792 (36%) of those participated by completing and returning the postal  
12  
13 questionnaire.  
14  
15  
16  
17  
18  
19

## 20 **Measurements**

### 21 Covariates

22  
23 In both surveys, sociodemographic data included age (years: 18–35, 36–50, 51–65,  $\geq 66$ ),  
24  
25 gender, urbanicity (inhabitants:  $< 20,000$ ,  $\geq 20,000$ ), current education level (years:  $< 11$ , 11–  
26  
27 13,  $\geq 14$ ), work status (unemployed, employed/under education, retired), and marital status  
28  
29 (single, married/partner, divorced, widowed).  
30  
31

32  
33 Participants with VI were asked to report their corrected degree of VI in the better-  
34  
35 seeing eye (blind, severe VI, moderate VI, undetermined), progression rate of vision loss  
36  
37 (stable, progressive), and total years lived with VI. A ‘age of VI onset’ variable was created  
38  
39 by dividing the participants’ age by their reporting on years lived with VI. The variable was  
40  
41 then categorized into: ‘since birth (0 years)’, ‘childhood/youth (1–24 years)’, and ‘adulthood  
42  
43 ( $\geq 25$  years)’. Furthermore, the participants were asked to describe whether they had other  
44  
45 impairments in addition to their VI. The response alternatives were: ‘no’, ‘yes, to some  
46  
47 extent’, and ‘yes, to a great extent’. Participants who reported impairment to some or great  
48  
49 extent were included in the ‘yes’ category, while those who reported having no other  
50  
51 impairments were included in the ‘no’ category.  
52  
53  
54  
55  
56  
57  
58  
59  
60



### Sexual assaults

In both surveys, past experience of sexual assaults was measured by the Life Event Checklist for DSM-5 (LEC-5). The questionnaire has demonstrated adequate test-retest reliability and moderate correlation with trauma-related mental disorders.[25] In the list of life events, participants were asked to describe whether they had experienced sexual assaults (rape, attempted rape, made to perform any type of sexual act through force or threat of harm). Those who reported 'that happened me' were categorized as 'yes' (1) and those who reported otherwise were categorized as 'no' (0).

### Self-efficacy

The General Self Efficacy Scale (GSE scale) was included to assess perception of self-efficacy in the VI population. The Norwegian version of the GSE scale has been shown to have a high test-retest reliability ( $r = 0.82$ ) and acceptable correlations with life satisfaction ( $r = 0.26$ ) and positive affect ( $r = 0.40$ ).[26] The scale consists of 10 statements about the participant's belief in one's ability to adequately respond to novel or challenging situations and to cope with a variety of stressors, and is scored on a 4-point Likert scale from 1 (not at all true) to 4 (exactly true). A sum score was calculated based on all 10 items, with higher scores representing greater self-efficacy. The sum score was treated as an untransformed continuous variable in our main analyses. The GSE scale had a Chronbach's alpha of 0.89.

### Life satisfaction

Cantril's Ladder of Life Satisfaction (CLLS) was used to measure current life satisfaction in the VI population.[27] The participants were asked to imagine themselves a ladder with 10 steps, of which the bottom of the ladder represented the worst possible life for them (a score

1  
2  
3 of 0) and the top of the ladder represented the best possible life for them (a score of 10). The  
4  
5 scale was treated as an untransformed continuous variable in the regression analyses.  
6  
7

## 8 9 **Statistical methods**

10  
11 We assessed the lifetime prevalence of sexual assaults in the VI population and in the general  
12  
13 population within strata of age and gender. All stratified proportions were estimated with  
14  
15 corresponding 95% exact binomial confidence intervals (CIs). Test of statistical significance  
16  
17 was performed using Fisher's exact test.  
18

19  
20 We used generalized linear models (GLMs) with Binomial distribution and log-link  
21  
22 function to estimate RRs and 95% CIs of sexual assaults in its association with each VI-  
23  
24 specific factor (VI severity, age of VI onset, VI stability, and having other impairments).  
25  
26 Model fit was evaluated using residual plots. The models were either unadjusted or age- and  
27  
28 gender-adjusted. No risk ratio modifications were observed of age or gender with each of the  
29  
30 VI-specific factors ( $p > 0.05$ ).  
31

32  
33 GLM with Gaussian distribution and identity-link function was used to estimate mean  
34  
35 scores of self-efficacy and life satisfaction of those who had experienced sexual assaults,  
36  
37 compared with the reference of no sexual assaults. Model estimates were presented in terms  
38  
39 of RRs and 95% CIs. Model fit was evaluated using residual plots. The GLMs were either  
40  
41 unadjusted or adjusted for age (years: 18–35, 36–50, 51–65,  $\geq 66$ ), gender, education (years:  
42  
43  $< 11$ , 11–13,  $\geq 14$ ), and VI severity (moderate VI, severe VI, blindness, undetermined VI). No  
44  
45 risk ratio modifications were found of sexual assault with each of the possible confounding  
46  
47 factors ( $p > 0.05$ ).  
48

49  
50 The significance level was set at  $p = 0.05$ . The statistical analyses were carried out  
51  
52 using Stata Version 14 (Stata Corp., Texas, USA).  
53  
54

## Ethics

The study was carried out anonymously and at request the Regional Committee for Medical and Health Research Ethics required no further formal ethical approval (Reference number: 2016/1615A). All participants gave their informed consent for taking part in the study. Study participation was voluntarily, and the participants were informed that they could withdraw from the study at any time.

## RESULTS

Table 1 shows the study characteristics of the VI population and the general population. The age distribution of the VI population (mean: 51.4, range: 18–95) was similar to that of the general population (mean: 53.2, range: 18–94). In both surveys, non-participants were more likely than participants to be of young or old age.

A total of 78 (10.6%, 95% CI: 8.5–13.1) of adults with VI and 109 (6.1%, 95% CI: 5.1–7.3) of adults from the general population reported having at some time experienced sexual assaults. Table 2 displays the prevalence rates of sexual assaults across strata of age and gender. For women, a higher prevalence of sexual assaults was observed among individuals with VI than that of the general population, and the largest difference was found among those aged 36 to 50 years. For men, no significant differences were observed. The female/male ratio was 7.3 for the VI population and 5.9 for the general population.

**Table 1.** Characteristics of the VI population and the GP population, according to gender.

|                                         | <b>Female VI</b> | <b>Female GP</b> | <b>Male VI</b>   | <b>Male GP</b>   |
|-----------------------------------------|------------------|------------------|------------------|------------------|
|                                         | <b>(n = 403)</b> | <b>(n = 941)</b> | <b>(n = 333)</b> | <b>(n = 828)</b> |
| <b>Characteristics</b>                  | <b>n (%)</b>     | <b>n (%)</b>     | <b>n (%)</b>     | <b>n (%)</b>     |
| <b>Age:</b> 18–35 years                 | 88 (21.8)        | 189 (20.1)       | 69 (20.7)        | 105 (12.7)       |
| 36–50 years                             | 101 (25.1)       | 273 (28.9)       | 85 (25.5)        | 184 (22.2)       |
| 51–65 years                             | 106 (26.3)       | 267 (28.4)       | 94 (28.2)        | 286 (34.5)       |
| ≥ 66 years                              | 108 (26.8)       | 212 (22.5)       | 85 (25.5)        | 253 (30.6)       |
| <b>Urbanicity:</b> < 20,000 inhabitants | 227 (56.3)       | 444 (47.3)       | 172 (51.7)       | 399 (48.9)       |
| ≥ 20,000 inhabitants                    | 176 (43.7)       | 494 (52.7)       | 161 (48.4)       | 426 (51.1)       |
| <b>Education:</b> < 11 years            | 69 (17.1)        | 79 (8.4)         | 46 (13.8)        | 62 (7.5)         |
| 11–13 years                             | 162 (40.2)       | 346 (36.7)       | 124 (37.2)       | 336 (40.5)       |
| ≥ 14 years                              | 172 (42.7)       | 517 (54.9)       | 163 (49.0)       | 432 (52.0)       |
| <b>Work status:</b> Employed/studying   | 154 (38.2)       | 641 (68.3)       | 160 (48.1)       | 526 (63.1)       |
| Unemployed                              | 152 (37.7)       | 82 (8.7)         | 73 (21.9)        | 60 (7.2)         |
| Retired                                 | 97 (24.1)        | 216 (23.0)       | 100 (30.0)       | 224 (29.3)       |
| <b>Marital status:</b> Single           | 131 (32.5)       | 133 (14.2)       | 129 (38.7)       | 96 (11.6)        |
| Married/partnership                     | 181 (44.9)       | 698 (74.3)       | 166 (49.9)       | 672 (80.9)       |
| Divorced                                | 46 (11.4)        | 59 (6.2)         | 25 (7.5)         | 38 (4.6)         |
| Widowed                                 | 45 (11.2)        | 49 (5.2)         | 13 (3.9)         | 25 (3.0)         |

*Note.* VI = visual impairment; GP = general population.

Figure 1 displays the unadjusted and age- and gender-adjusted risk of sexual assaults for VI-related characteristics in the VI population. Individuals with other impairments in addition to their vision loss had a greater risk of experiencing sexual assaults (RR: 1.71, 95% CI: 1.15–2.55) than individuals who did not have any other impairments. No significant associations were found with other VI-related factors.

1  
2  
3  
4  
5  
6  
7  
8  
9  
10  
11  
12  
13  
14  
15  
16  
17  
18  
19  
20  
21  
22  
23  
24  
25  
26  
27  
28  
29  
30  
31  
32  
33  
34  
35  
36  
37  
38  
39  
40  
41  
42  
43  
44  
45  
46  
47

**Table 2.** Prevalence of sexual assaults in the VI population and in the GP population, according to age and gender.

|                   | Female VI (n = 403) |                  | Female GP (n = 941) |                 | p-value#  | Male VI (n = 333) |                | Male GP (n = 828) |               | p-value# |
|-------------------|---------------------|------------------|---------------------|-----------------|-----------|-------------------|----------------|-------------------|---------------|----------|
|                   | Cases/tot           | % (95% CI)       | Cases/tot           | % (95% CI)      |           | Cases/tot         | % (95% CI)     | Cases/tot         | % (95% CI)    |          |
| <b>Age groups</b> |                     |                  |                     |                 |           |                   |                |                   |               |          |
| 18–35 years       | 15/88               | 17.1 (10.5–26.5) | 22/189              | 11.6 (7.8–17.1) | p = 0.26  | 1/69              | 1.5 (0.2–9.7)  | 1/105             | 1.0 (0.1–6.5) | P = 1.00 |
| 36–50 years       | 26/101              | 25.7 (18.1–35.2) | 31/273              | 11.4 (8.1–15.7) | p = 0.001 | 4/85              | 4.7 (1.8–12.0) | 3/184             | 1.6 (0.5–5.0) | P = 0.21 |
| 51–65 years       | 17/106              | 16.0 (10.2–24.4) | 28/267              | 10.5 (7.3–14.8) | p = 0.16  | 2/94              | 2.1 (0.5–8.2)  | 6/286             | 2.1 (0.9–4.6) | P = 1.00 |
| ≥ 66 years        | 12/108              | 11.1 (6.4–18.6)  | 13/212              | 6.1 (3.6–10.3)  | p = 0.13  | 1/85              | 1.2 (0.2–8.0)  | 4/253             | 1.6 (0.6–4.1) | P = 1.00 |
| <b>Total</b>      | 70/403              | 17.4 (14.0–21.4) | 94/941              | 10.0 (8.3–12.1) | p < 0.001 | 8/333             | 2.4 (1.2–4.7)  | 14/828            | 1.7 (1.0–2.8) | P = 0.48 |

Notes. CI = confidence intervals; VI = visual impairment; GP = general population; tot = total number of participants in that particular subgroup.

# = p-value calculated using Fisher’s exact test.

view only

1  
2  
3 In individuals with VI who had experienced sexual assaults, the mean scores (standard  
4 deviation, SD) were 29.8 (5.7) for self-efficacy and 5.8 (2.3) for life satisfaction. In  
5  
6 individuals with VI who had not experience any sexual assaults, the mean scores (SD) were  
7  
8 31.7 (5.0) for self-efficacy and 6.9 (1.9) for life satisfaction. Results from the unadjusted  
9  
10 GLMs showed that those who had been exposed to sexual assault had lower levels of self-  
11  
12 efficacy (RR: 0.21, 95% CI: 0.07–0.64) and life satisfaction (RR: 0.31, 95% CI: 0.19–0.50)  
13  
14 compared with those who had not been sexually assaulted. After adjusting for age, gender,  
15  
16 education and VI severity, the associations remained statistically significant for both self-  
17  
18 efficacy (RR: 0.18, 95% CI: 0.05–0.61) and life satisfaction (RR: 0.33, 95% CI: 0.20–0.53).  
19  
20  
21  
22  
23

24 ---Figure 1 about here---

## 25 26 27 28 **DISCUSSION**

29  
30 The results from this cross-sectional study showed a higher prevalence of people in the VI  
31  
32 population being exposed to sexual assaults such as being raped and forced into sexual acts  
33  
34 compared to that in the general population, reaching statistical significance for women only.  
35  
36 In the population of people with VI, the risk of sexual assaults was particularly high among  
37  
38 individuals having other impairments in addition to their vision loss. Lastly, individuals with  
39  
40 VI who had been assaulted sexually had lower levels of self-efficacy and life satisfaction  
41  
42 compared with the reference of no sexual assaults.  
43  
44  
45  
46  
47

### 48 **Strengths and limitations**

49  
50 This is one of few studies addressing the prevalence and associated factors of sexual assaults  
51  
52 by including a probability sample of adults with VI,[19] and extends previous research by  
53  
54 obtaining valid estimates of sexual assaults across a broad array of age groups and including  
55  
56  
57  
58  
59  
60

1  
2  
3 data obtained from the general population. Other study strengths are the detailed description  
4  
5 of important VI characteristics and the use of interview-based assessments with validated  
6  
7 instruments.

8  
9 The cross-sectional observational study design limited the possibility to address  
10  
11 relationships of cause and effect, and, although we have controlled for some potentially  
12  
13 confounding factors, it is plausible that our analyses are subjected to residual confounding. In  
14  
15 addition, there may be differences in what people perceive or define as sexual assault. We  
16  
17 believe that the specific examples of violent behaviours included in the study question made it  
18  
19 easier for people to grasp what is meant by sexual assaults. Furthermore, the use of self-  
20  
21 reports may have affected the accuracy and validity of the estimates, and the prevalence of  
22  
23 sexual assaults could be underestimated as a function of response biases like recall bias and  
24  
25 self-disclosure bias. Data on sexual assaults was obtained by telephone interviews in the VI  
26  
27 population and by postal survey in the general population. Reviews of the literature suggest  
28  
29 higher rates of sensitive information when reported by questionnaires than by interviews.[28,  
30  
31 29] Thus, the observed difference between people with VI and the general population may be  
32  
33 a conservative estimate.  
34  
35

36  
37 As in most studies focusing on sensitive topics,[29] the high rates of people declining  
38  
39 to participate from the VI population and the general population may have introduced biased  
40  
41 estimates. We believe that the bias of sample selection have primarily affected the frequencies  
42  
43 of sexual assaults and other covariates and to a lesser extent the relationships of interest.[30]  
44  
45 Lastly, inclusion of participants from a membership organization of blind and visually  
46  
47 impaired people questions the representativeness of our study sample. Our study sample is  
48  
49 comparable to 2015 census data of people who had vision difficulties with regard to gender  
50  
51 (Male gender: 45% versus 46%), employment (46% versus 43%) and geographical location,  
52  
53  
54  
55  
56  
57  
58  
59  
60

1  
2 while we included a higher percentage of people having higher education (45% versus 18%)  
3  
4 and living alone (41% versus 20%).[31]  
5  
6  
7

### 8 9 **Relation to other studies**

10 The lifetime prevalence of sexual assaults in our study population were either equal to or  
11  
12 lower than what have been found in comparable studies of blind and visually impaired  
13  
14 populations in the US (12%)[19] or in Norway (18%).[18] Furthermore, the results from our  
15  
16 study are partly in agreement to the hypothesis of VI as a risk factor for experiencing serious  
17  
18 forms of sexual violence.[18] However, the low number of cases among men makes it  
19  
20 difficult to draw inferences for the male population.  
21  
22  
23

24 Our results of higher rates of sexual assaults in those having other functional  
25  
26 impairments in addition to their VI illustrates that being markedly different from non-  
27  
28 impaired people, and especially visibly different, may put individuals at risk of being exposed  
29  
30 to certain forms of violence and abuse. Unlike the study by Kvam,[18] we did not observe any  
31  
32 significant associations between age of VI onset and sexual assaults.  
33  
34

35 We found a lower lifetime prevalence of sexual assault in adults 51 years or older  
36  
37 compared with younger age groups. This deserves to be commented as we expected a  
38  
39 cumulative exposure to assaults with increasing age. In addition to the possibility of recall  
40  
41 bias and differences across age cohorts in attitudes towards violence,[32] our findings may be  
42  
43 explained by a high percentage of participants in older age groups who developed their VI in  
44  
45 old age.[13]  
46  
47  
48  
49

### 50 **Risk of sexual assault**

51 Individuals with VI may be at risk of sexual assaults for many reasons, being either specific to  
52  
53 VI itself or related to having an impairment in general. First, many people with VI are known  
54  
55  
56



1  
2  
3 to have lower socioeconomic status and to be more prone of social isolation and  
4  
5 dependency.[33] This makes it easier for a perpetrator to assert power and control over the  
6  
7 victim.[10] Being dependent on other people in care or service situations, which may be the  
8  
9 case especially for some of those having additional impairments, may provide for closeness  
10  
11 and intimacy.[10] Often, the perpetrator has a close relationship to the victim. It has been  
12  
13 found that nine in ten victims with VI were abused either by an acquaintance or a close  
14  
15 relative.[18] Important issues related to sexual violence are differences in power and control.  
16  
17 Negative social views towards people with impairments, like stigmatization and  
18  
19 discrimination, may be internalized by the individual, leading to low self-esteem and feelings  
20  
21 of self-blame.[34] Dependency, fear of being left alone, and feelings of unworthiness can get  
22  
23 people to stay in a relationship that is potentially abusive.  
24  
25  
26  
27

### 28 **Self-efficacy and life satisfaction**

29  
30 To our knowledge, this is the first study addressing possible consequences of being exposed  
31  
32 to sexual violence among individuals with VI. Our findings of an association between sexual  
33  
34 assault and lower levels of self-efficacy or life satisfaction in adults with VI are similar to  
35  
36 what has been observed in the general population,[2, 35, 36] and may have similar plausible  
37  
38 explanations. Rape and forced sexual acts might cause deep-rooted consequences in various  
39  
40 life domains, such as role management and the ability to socialize.[37] Moreover, lower levels  
41  
42 of self-efficacy and life satisfaction could be due to the fact that traumatic events like rape  
43  
44 could affect people's view of themselves, others, and the world, as well as resulting in stress  
45  
46 reactions like avoidance, low self-esteem, negative cognition, and self-blaming.[38] Self-  
47  
48 efficacy is a key psychological component for restoring functioning and health after  
49  
50 experiencing trauma, and the ability to handle post-traumatic stress reactions is associated  
51  
52 with self-efficacy beliefs in the future.[36]  
53  
54  
55  
56

## Implications

The high prevalence of sexual assault in people with sensory impairments calls for preventive measures. Violence prevention strategies should try to raise public awareness, promote open discussion, and upgrade professional education, service support and guidance.[39] There is also a need for strategies that provides safe avenues through which people with VI can escape or recover after an assaulting event. Until now, few people with VI have prosecuted the perpetrator,[18] and measures to intensify the legal protection of people with VI should be addressed.

Violence is largely about power and oppression.[6] Impaired individuals' risk of serious forms of sexual violence may be rooted in social isolation and being of a low social position. Thus, social integration of people with impairments should be a main objective to make them more robust towards sexual assaults, which can be achieved through universal design of information and public spaces, reducing stigmatization and discrimination towards people with impairments, and fostering self-reliance and independency of the individual.

Possible consequences of sexual assaults for self-efficacy and life satisfaction emphasize the need of professional assistance for those who have been abused. Access to help service is crucial, and adapted information and professionals trained to the needs and challenges of people with VI are recommended.

## Acknowledgement

A thank you to Marianne Bang Hansen for her contribution to the study design and data collection. We also want to thank Sverre Fuglerud, Per Fosse, and Liv Berit Augestad for valuable insights into the lives of people who are blind and visually impaired. Lastly, we would like to give a thank you to all collaborating project partners in the European Network

1  
2  
3 for Psychosocial Crisis Management - Assisting Disabled in Case of Disaster (EUNAD) for  
4 making it possible for us to conduct this research study.  
5  
6  
7  
8

### 9 **Conflict of interest statement**

10  
11 None declared.  
12  
13

### 14 **Funding statement**

15  
16 This work received grants from the European Commission, Directorate - General  
17  
18 Humanitarian Aid and Civil Protection (Grant number: ECHO/SUB/2015/718665/PREP17).  
19  
20  
21  
22

### 23 **Author contributions**

24  
25 A. Brunes planned the statistical analysis, analysed and interpreted the data, and drafted and  
26  
27 revised the paper. T. Heir designed the research study, monitored data collection for the whole  
28  
29 study, cleaned the data, interpreted the data, and drafted and revised the paper.  
30  
31  
32  
33

### 34 **Data sharing statement**

35  
36 Data are from the research project European Network for Psychosocial Crisis Management -  
37  
38 Assisting Disabled in Case of Disaster (EUNAD). Public availability may compromise privacy of  
39  
40 the respondents. According to the informed consent given by each respondent, the data is to  
41  
42 be stored properly and in line with the Norwegian Law of Privacy Protection. However,  
43  
44 anonymized data is available to researchers who provide a methodological sound proposal in  
45  
46 accordance with the informed consent of the respondents. Interested researchers can contact  
47  
48 project leader Trond Heir ([trond.heir@medisin.uio.no](mailto:trond.heir@medisin.uio.no)) with request for our study data.  
49  
50  
51  
52  
53  
54  
55  
56

## References

1. Walsh K, Galea S, Koenen KC. Mechanisms underlying sexual violence exposure and psychosocial sequelae: a theoretical and empirical review. *Clin Psychol (New York)*. 2012;19(3):260–75. [DOI:10.1111/cpsp.12004]
2. Hughes K, Bellis MA, Hardcastle KA, et al. The effect of multiple adverse childhood experiences on health: a systematic review and meta-analysis. *Lancet Public Health*. 2017;2(8):356–66. [DOI:10.1016/S2468-2667(17)30118-4]
3. GBD 2015 Risk Factors Collaborators. Global, regional, and national comparative risk assessment of 79 behavioural, environmental and occupational, and metabolic risks or clusters of risks, 1990–2015: a systematic analysis for the Global Burden of Disease Study 2015. *Lancet*. 2016;388(10053):1659–724. [DOI:10.1016/S0140-6736(16)31679-8]
4. Welch J, Mason F. Rape and sexual assault. *BMJ*. 2007;334(7604):1154–8. [DOI:10.1136/bmj.39211.403970.BE]
5. Sugar NF, Fine DN, Eckert LO. Physical injury after sexual assault: findings of a large case series. *Am J Obstet Gynecol*. 2004;190(1):71–6.
6. Sokoloff NJ, Dupont I. Domestic violence at the intersections of race, class, and gender: challenges and contributions to understanding violence against marginalized women in diverse communities. *Violence Against Women*. 2005;11(1):38–64. [DOI:10.1177/1077801204271476]
7. Abrahams N, Devries K, Watts C, et al. Worldwide prevalence of non-partner sexual violence: a systematic review. *Lancet*. 383(9929):1648–54. [DOI: 10.1016/S0140-6736(13)62243-6]
8. Rothman EF, Exner D, Baughman AL. The prevalence of sexual assault against people who identify as gay, lesbian, or bisexual in the United States: a systematic review. *Trauma Violence Abuse*. 2011;12(2):55–66. [DOI: 10.1177/1524838010390707]

- 1  
2  
3 9. Hughes K, Bellis MA, Jones L, et al. Prevalence and risk of violence against adults with  
4 disabilities: a systematic review and meta-analysis of observational studies. *Lancet*.  
5  
6 379(9826):1621–9. [DOI: 10.1016/S0140-6736(11)61851-5]  
7  
8
- 9 10. Plummer S-B, Findley PA. Women with disabilities' experience with physical and sexual  
10 abuse: review of the literature and implications for the field. *Trauma Violence Abuse*.  
11  
12 2012;13(1):15–29. [DOI: 10.1177/1524838011426014]  
13  
14
- 15 11. Colenbrander A. Assessment of functional vision and its rehabilitation. *Acta Ophthalmol*.  
16  
17 2010;88(2):163–73. [10.1111/j.1755-3768.2009.01670.x]  
18  
19
- 20 12. World Health Organization. International Classification of Diseases 10th revision: version  
21 2016: World Health Organization; 2018 [cited 2018-01-05]. Available from:  
22  
23 <http://apps.who.int/classifications/icd10/browse/2016/en/>.  
24  
25
- 26 13. Pascolini D, Mariotti SP. Global estimates of visual impairment: 2010. *Br J Ophthalmol*.  
27  
28 2012;96(5):614–8. [DOI: 10.1136/bjophthalmol-2011-300539]  
29  
30
- 31 14. Solebo AL, Rahi J. Epidemiology, aetiology and management of visual impairment in  
32 children. *Arch Dis Child*. 2014;99(4):375–9. [DOI: 10.1136/archdischild-2012-303002]  
33  
34
- 35 15. Rosenberg T, Flage T, Hansen E, et al. Incidence of registered visual impairment in the  
36 Nordic child population. *Br J Ophthalmol*. 1996;80(1):49–53.  
37  
38
- 39 16. Rahi JS, Cumberland PM, Peckham CS. Improving detection of blindness in childhood:  
40 the British Childhood Vision Impairment study. *Pediatrics*. 2010;126(4):895–903. [DOI:  
41  
42 10.1542/peds.2010-0498]  
43  
44
- 45 17. Court H, McLean G, Guthrie B, et al. Visual impairment is associated with physical and  
46 mental comorbidities in older adults: a cross-sectional study. *BMC Med*. 2014;12(1):181.  
47  
48 [DOI: 10.1186/s12916-014-0181-7]  
49  
50  
51  
52  
53  
54  
55  
56  
57  
58  
59  
60

- 1  
2  
3 18. Kvam MH. Experiences of childhood sexual abuse among visually impaired adults in  
4 Norway: prevalence and characteristics. *Journal of Visual Impairment & Blindness*.  
5 2005;99(1):5–14.  
6  
7  
8  
9 19. Kelley SD, Moore J. Abuse and violence in the lives of people with low vision: a national  
10 survey. *RE:view*. 2000;31(4):155–64.  
11  
12  
13 20. Spencer N, Devereux E, Wallace A, et al. Disabling conditions and registration for child  
14 abuse and neglect: a population-based study. *Pediatrics*. 2005;116(3):609–13. [DOI:  
15 10.1542/peds.2004-1882]  
16  
17  
18 21. Pava WS. Visually impaired persons' vulnerability to sexual and physical assault. *Jornal*  
19 *of Visual Impairment & Blindness*. 1994;88(2):103–12.  
20  
21  
22 22. Rounds DL, Jr. Victimization of individuals with legal blindness: Nature and forms of  
23 victimization. *Behavioral Sciences & the Law*. 1996;14(1):29–40. [DOI: 10.1002/(SICI)1099-  
24 0798(199624)14:1<29::AID-BSL222>3.0.CO;2-8]  
25  
26  
27 23. The Norwegian Association of the Blind and Partially Sighted. Om Blindeforbundet  
28 [About the Norwegian Association of the Blind and Partially Sighted]. Available from:  
29 <https://www.blindeforbundet.no/om-blindeforbundet>.  
30  
31  
32 24. Schou-Bredal I, Heir T, Skogstad L, et al. Population-based norms of the Life Orientation  
33 Test–Revised (LOT-R). *International Journal of Clinical and Health Psychology*.  
34 2017;17(3):216–24. [DOI: 10.1016/j.ijchp.2017.07.005]  
35  
36  
37 25. Gray MJ, Litz BT, Hsu JL, et al. Psychometric properties of the life events checklist.  
38 *Assessment*. 2004;11(4):330–41. [DOI: 10.1177/1073191104269954]  
39  
40  
41 26. Leganger A, Kraft P, Røysamb E. Perceived self-efficacy in health behaviour research:  
42 conceptualisation, measurement and correlates. *Psychology and Health*. 2000;15(1):51–69.  
43 [DOI: 10.1080/08870440008400288]  
44  
45  
46 27. Cantril H. A study of aspirations. *Ekistics*. 1963;16(93):121–4.  
47  
48  
49  
50  
51  
52  
53  
54  
55  
56  
57  
58  
59  
60

- 1  
2  
3 28. Bowling A. Mode of questionnaire administration can have serious effects on data quality.  
4  
5 *J Public Health (Oxf)*. 2005;27(3):281–91. [DOI: 10.1093/pubmed/fdi031]  
6  
7 29. Tourangeau R, Yan T. Sensitive questions in surveys. *Psychol Bull*. 2007;133(5):859.  
8  
9 [DOI: 10.1037/0033-2909.133.5.859]  
10  
11 30. Rothman KJ, Gallacher JEJ, Hatch EE. Why representativeness should be avoided. *Int J*  
12  
13 *Epidemiol*. 2013;42(4):1012-4. [DOI: 10.1093/ije/dys223]  
14  
15 31. Statistics Norway. Statistikkbanken [Statistics Norway Databank] Oslo, Norway:  
16  
17 Statistics Norway. Available from: <https://www.ssb.no/statistikkbanken>.  
18  
19 32. Luoma M-L, Manderbacka C. Breaking the taboo overview of research phase Finland.  
20  
21 2008. Available from: [http://eige.europa.eu/gender-based-](http://eige.europa.eu/gender-based-violence/resources/finland/breaking-taboo-overview-research-phase-finland)  
22  
23 [violence/resources/finland/breaking-taboo-overview-research-phase-finland](http://eige.europa.eu/gender-based-violence/resources/finland/breaking-taboo-overview-research-phase-finland)  
24  
25 33. Lane M, Lane V, Abbott J, et al. Multiple deprivation, vision loss, and ophthalmic disease  
26  
27 in adults: global perspectives. *Surv Ophthalmol*. 2017. [DOI:  
28  
29 10.1016/j.survophthal.2017.10.009]  
30  
31 34. Hassouneh-Phillips D, McNeff E. “I thought I was less worthy”: Low sexual and body  
32  
33 esteem and increased vulnerability to intimate partner abuse in women with physical  
34  
35 disabilities. *Sex Disabil*. 2005;23(4):227–40. [DOI: 10.1007/s11195-005-8930-3]  
36  
37 35. Jumper SA. A meta-analysis of the relationship of child sexual abuse to adult  
38  
39 psychological adjustment. *Child Abuse Negl*. 1995;19(6):715–28.  
40  
41 36. Diehl AS, Prout MF. Effects of posttraumatic stress disorder and child sexual abuse on  
42  
43 self-efficacy development. *Am J Orthopsychiatry*. 2002;72(2):262–5.  
44  
45 37. Dillon G, Hussain R, Loxton D, et al. Mental and physical health and intimate partner  
46  
47 violence against women: a review of the literature. *Int J Family Med*. 2013;2013. [DOI:  
48  
49 10.1155/2013/313909]  
50  
51  
52  
53  
54  
55  
56  
57  
58  
59  
60

1  
2  
3 38. American Psychiatric Association. Diagnostic and statistical manual of mental disorders,  
4 fifth edition (DSM-5). Washington, DC: American Psychiatric Pub 2013.

5  
6  
7 39. Brown H. Safeguarding adults and children with disabilities against abuse. Strasbourg:  
8 European Council of Europe 2003. Available from: <https://rm.coe.int/16805a297e>.

9  
10  
11  
12  
13  
14  
15  
16  
17  
18  
19  
20  
21  
22  
23  
24  
25  
26  
27  
28  
29  
30  
31  
32  
33  
34  
35  
36  
37  
38  
39  
40  
41  
42  
43  
44  
45  
46  
47  
48  
49  
50  
51  
52  
53  
54  
55  
56  
57  
58  
59  
60

For peer review only



1  
2  
3 **Figure 1.** Risk of sexual assault for various visual impairment (VI) characteristics in a  
4 population of people who are blind and visually impaired (n = 736); Results unadjusted (blue)  
5 and adjusted for age and gender (red).  
6  
7  
8  
9  
10  
11  
12  
13  
14  
15  
16  
17  
18  
19  
20  
21  
22  
23  
24  
25  
26  
27  
28  
29  
30  
31  
32  
33  
34  
35  
36  
37  
38  
39  
40  
41  
42  
43  
44  
45  
46  
47  
48  
49  
50  
51  
52  
53  
54  
55  
56  
57  
58  
59  
60

For peer review only

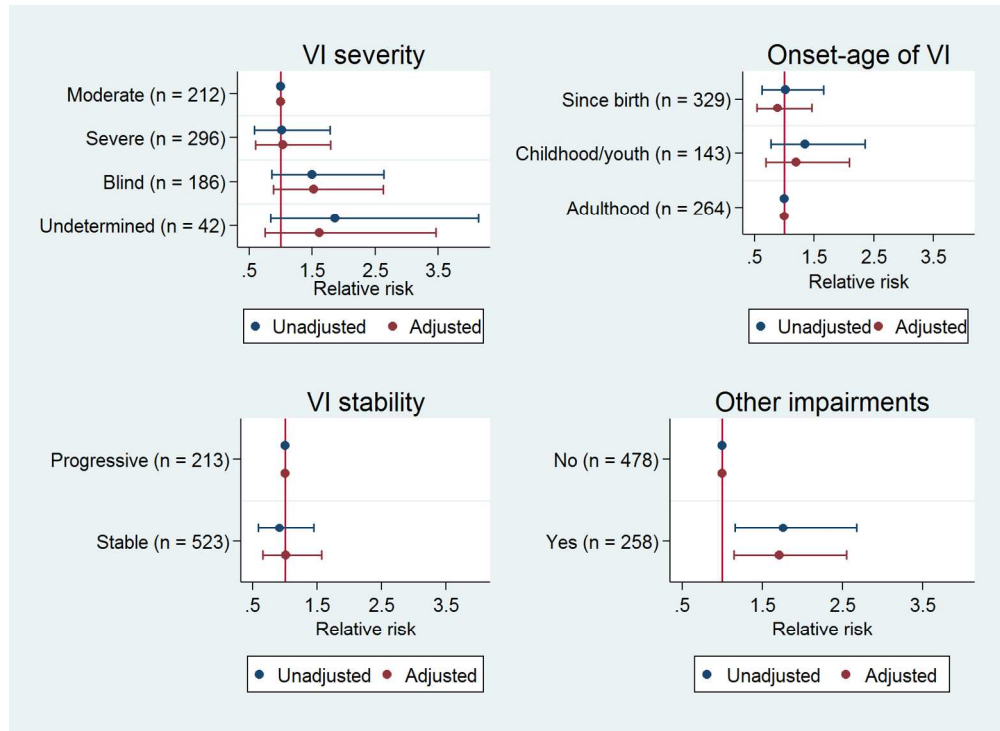

Figure 1. Risk of sexual assault for various visual impairment (VI) characteristics in a population of people who are blind and visually impaired (n = 736); Results unadjusted (blue) and adjusted for age and gender (red).

630x458mm (72 x 72 DPI)

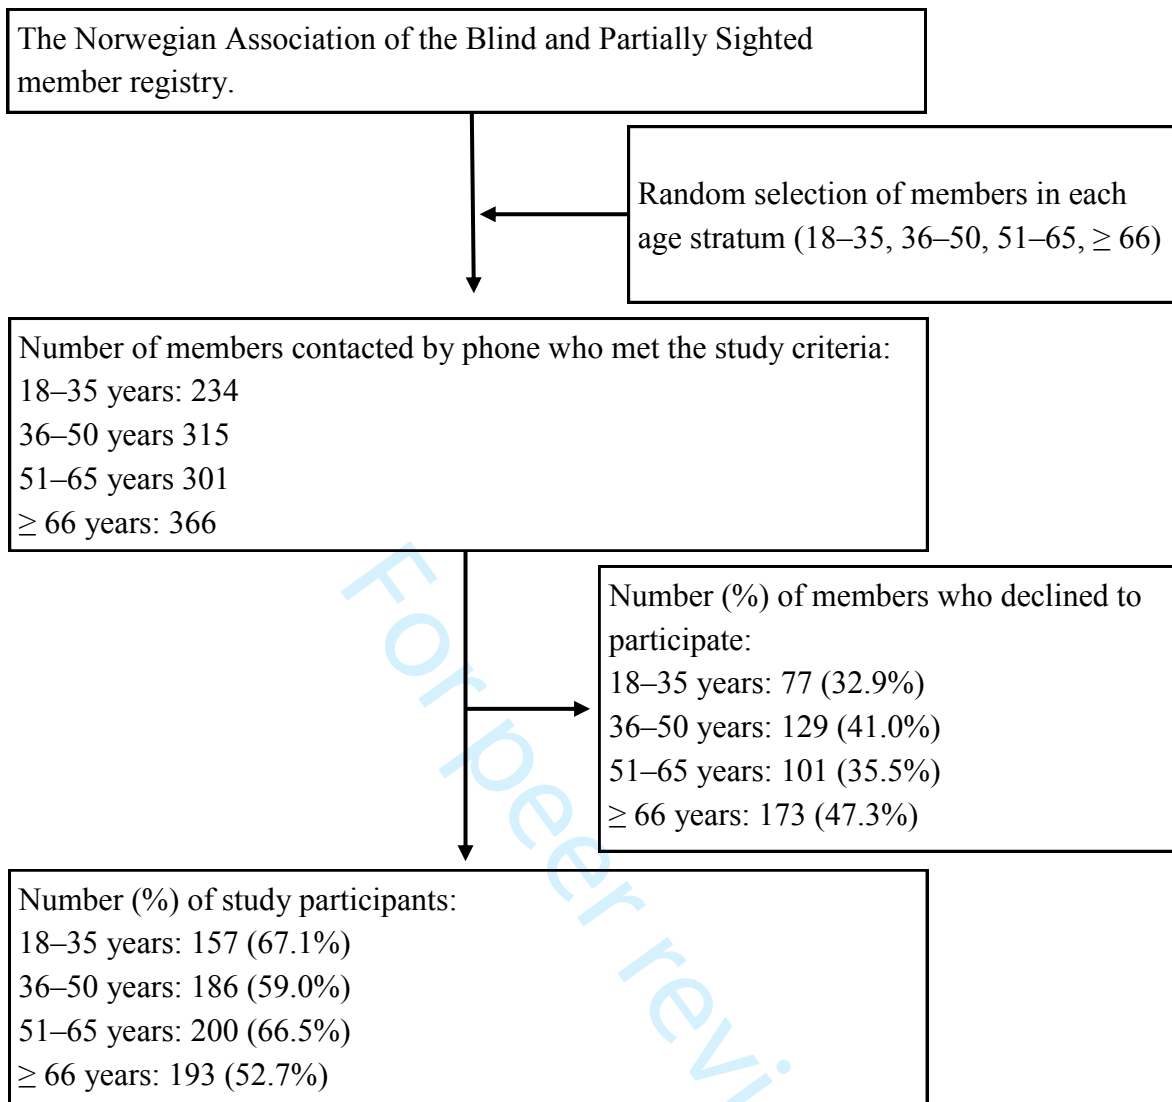

**Figure S1.** Selection of study participants.

**Table S1.** Study characteristics and VI-specific factors of the VI population, according to various degrees of vision loss (n = 736).

| Characteristics                        | VI severity# |             |             |              |
|----------------------------------------|--------------|-------------|-------------|--------------|
|                                        | Moderate VI  | Severe VI   | Blindness   | Undetermined |
| <b>Age (mean, SD)</b>                  | 53.6 (17.4)  | 48.3 (16.8) | 53.2 (16.7) | 54.9 (17.0)  |
| <b>Gender (n, %):</b> Women            | 130 (61.3)   | 152 (51.4)  | 96 (51.6)   | 25 (59.5)    |
| Men                                    | 82 (38.7)    | 144 (48.6)  | 90 (48.4)   | 17 (40.5)    |
| <b>Education (n, %):</b> < 11 years    | 40 (18.9)    | 36 (12.2)   | 33 (17.7)   | 6 (14.3)     |
| 11–13 years                            | 82 (38.7)    | 129 (43.6)  | 62 (33.3)   | 13 (31.0)    |
| ≥ 14 years                             | 90 (42.5)    | 131 (44.3)  | 91 (48.9)   | 23 (54.8)    |
| <b>Age at VI onset (mean, SD)</b>      | 26.9 (25.8)  | 22.0 (18.3) | 10.1 (16.2) | 32.6 (21.6)  |
| <b>Cause of VI (n, %):</b> Disease     | 124 (58.5)   | 147 (49.7)  | 69 (37.1)   | 29 (69.0)    |
| Trauma/injury                          | 11 (5.2)     | 15 (5.1)    | 21 (11.3)   | 7 (16.7)     |
| Prenatal/postnatal causes              | 77 (36.3)    | 134 (45.3)  | 96 (51.6)   | 6 (14.3)     |
| <b>VI stability (n, %):</b> Congenital | 77 (36.3)    | 134 (45.3)  | 96 (51.6)   | 6 (14.3)     |
| Acquired, progressive                  | 80 (37.7)    | 103 (34.8)  | 52 (28.0)   | 20 (47.6)    |
| Acquired, sudden                       | 55 (25.9)    | 59 (19.9)   | 38 (20.4)   | 16 (38.1)    |
| <b>Access VI equipment (n, %):</b> No  | 132 (62.3)   | 83 (28.0)   | 1 (0.5)     | 31 (73.8)    |
| Yes                                    | 80 (37.7)    | 213 (72.0)  | 185 (99.5)  | 11 (26.2)    |
| <b>Other impairments (n, %):</b> No    | 137 (64.6)   | 195 (65.9)  | 121 (65.0)  | 25 (59.5)    |
| Yes                                    | 75 (35.4)    | 101 (34.1)  | 65 (35.0)   | 17 (40.5)    |

*Notes.* VI = visual impairment; SD = standard deviation;

# = Statistical significance determined either through ANOVA or Person's Chi-squared test. We found significant differences across VI severities with regard to mean age (F: 5.8,  $p < 0.001$ ), mean age at VI onset (F: 24.7,  $p < 0.001$ ), VI stability ( $\chi^2$ : 25.7,  $p < 0.001$ ), cause of VI ( $\chi^2$ : 14.2,  $p = 0.002$ ), and access to VI equipment ( $\chi^2$ : 203.9,  $p < 0.001$ ). No significant differences were observed for gender ( $\chi^2$ : 6.2,  $p = 0.10$ ), education ( $\chi^2$ : 9.9,  $p = 0.13$ ), and having other impairments ( $\chi^2$ : 0.7,  $p = 0.88$ ).

**STROBE 2007 (v4) checklist of items to be included in reports of observational studies in epidemiology\***  
**Checklist for cohort, case-control, and cross-sectional studies (combined)**

| Section/Topic        | Item # | Recommendation                                                                                                       | Reported on page #                                                                                                                                                                                                                                                                                                                                                                             |
|----------------------|--------|----------------------------------------------------------------------------------------------------------------------|------------------------------------------------------------------------------------------------------------------------------------------------------------------------------------------------------------------------------------------------------------------------------------------------------------------------------------------------------------------------------------------------|
| Title and abstract   | 1      | (a) Indicate the study’s design with a commonly used term in the title or the abstract                               | Page 1                                                                                                                                                                                                                                                                                                                                                                                         |
|                      |        | (b) Provide in the abstract an informative and balanced summary of what was done and what was found                  | Page 2                                                                                                                                                                                                                                                                                                                                                                                         |
| <b>Introduction</b>  |        |                                                                                                                      |                                                                                                                                                                                                                                                                                                                                                                                                |
| Background/rationale | 2      | Explain the scientific background and rationale for the investigation being reported                                 | Page 4                                                                                                                                                                                                                                                                                                                                                                                         |
| Objectives           | 3      | State specific objectives, including any pre-specified hypotheses                                                    | Page 5                                                                                                                                                                                                                                                                                                                                                                                         |
| <b>Methods</b>       |        |                                                                                                                      |                                                                                                                                                                                                                                                                                                                                                                                                |
| Study design         | 4      | Present key elements of study design early in the paper                                                              | <p><b>VI population</b><br/>           “This cross-sectional study included a probability sample of adults with VI (≥ 18 years)”, Page 5</p> <p><b>General population</b><br/>           “Norm data were based on the Norwegian Population Study (NorPop), a cross-sectional survey including a representative sample of adults (≥ 18 years) from the general Norwegian population” Page 5</p> |
| Setting              | 5      | Describe the setting, locations, and relevant dates, including periods of recruitment, exposure, follow-up, and data | <b>VI population</b>                                                                                                                                                                                                                                                                                                                                                                           |

1  
2  
3  
4  
5  
6  
7  
8  
9  
10  
11  
12  
13  
14  
15  
16  
17  
18  
19  
20  
21  
22  
23  
24  
25  
26  
27  
28  
29  
30  
31  
32  
33  
34  
35  
36  
37  
38  
39  
40  
41  
42  
43  
44  
45  
46  
47

|              |   |                                                                                                                                                                                                                                                                                                                                                                                                                                                                                    |                                                                                                                                                                                                                                                                                                                                 |
|--------------|---|------------------------------------------------------------------------------------------------------------------------------------------------------------------------------------------------------------------------------------------------------------------------------------------------------------------------------------------------------------------------------------------------------------------------------------------------------------------------------------|---------------------------------------------------------------------------------------------------------------------------------------------------------------------------------------------------------------------------------------------------------------------------------------------------------------------------------|
|              |   | collection                                                                                                                                                                                                                                                                                                                                                                                                                                                                         | <p>“Data were collected through structured telephone interviews by a survey company in the period between February 1 and May 31, 2017”, page 5</p> <p><b>General population</b><br/>“The study data were collected by postal questionnaires in the period between 2014 and 2015.” Page 5 and 6</p>                              |
| Participants | 6 | <p>(a) <i>Cohort study</i>—Give the eligibility criteria, and the sources and methods of selection of participants. Describe methods of follow-up</p> <p><i>Case-control study</i>—Give the eligibility criteria, and the sources and methods of case ascertainment and control selection. Give the rationale for the choice of cases and controls</p> <p><i>Cross-sectional study</i>—Give the eligibility criteria, and the sources and methods of selection of participants</p> | <p><b>VI population</b><br/>“This cross-sectional study included a probability sample of adults with VI (<math>\geq 18</math> years) who were members of the Norwegian Association of the Blind and Partially Sighted.” Page 5</p> <p>“To ensure adequate number of participants in the younger age groups, a simple random</p> |

1  
2  
3  
4  
5  
6  
7  
8  
9  
10  
11  
12  
13  
14  
15  
16  
17  
18  
19  
20  
21  
22  
23  
24  
25  
26  
27  
28  
29  
30  
31  
32  
33  
34  
35  
36  
37  
38  
39  
40  
41  
42  
43  
44  
45  
46  
47

For peer review only

|  |                                                                                                                                                                                                                              |                                                                                                                                                                                                                                                                                                                                                                                                                                                                                                                       |
|--|------------------------------------------------------------------------------------------------------------------------------------------------------------------------------------------------------------------------------|-----------------------------------------------------------------------------------------------------------------------------------------------------------------------------------------------------------------------------------------------------------------------------------------------------------------------------------------------------------------------------------------------------------------------------------------------------------------------------------------------------------------------|
|  |                                                                                                                                                                                                                              | <p>sampling was used within each of the following four age strata: 18–35, 36–50, 51–65, and ≥ 66.” Page 5</p> <p><b>General population</b><br/>“a representative sample of adults (≥ 18 years) from the general Norwegian population” Page 6</p> <p>“Simple random sampling was conducted based on names and addresses from the Central National Register of Norway, and effort was made to ensure that the sample reflected the Norwegian population in terms of age, gender, and geographical location.” Page 6</p> |
|  | <p>(b) <i>Cohort study</i>—For matched studies, give matching criteria and number of exposed and unexposed<br/><i>Case-control study</i>—For matched studies, give matching criteria and the number of controls per case</p> |                                                                                                                                                                                                                                                                                                                                                                                                                                                                                                                       |

|                           |    |                                                                                                                                                                                      |                                                                                                                                                                                                                                                                                         |
|---------------------------|----|--------------------------------------------------------------------------------------------------------------------------------------------------------------------------------------|-----------------------------------------------------------------------------------------------------------------------------------------------------------------------------------------------------------------------------------------------------------------------------------------|
| Variables                 | 7  | Clearly define all outcomes, exposures, predictors, potential confounders, and effect modifiers. Give diagnostic criteria, if applicable                                             | Page 6, 7 and 8                                                                                                                                                                                                                                                                         |
| Data sources/ measurement | 8* | For each variable of interest, give sources of data and details of methods of assessment (measurement). Describe comparability of assessment methods if there is more than one group | Page 6 and 7                                                                                                                                                                                                                                                                            |
| Bias                      | 9  | Describe any efforts to address potential sources of bias                                                                                                                            | <p>“The models were either unadjusted or age- and gender-adjusted.” Page 8</p> <p>“The GLMs were either unadjusted or adjusted for age, gender, education, and VI severity.” Page 8</p>                                                                                                 |
| Study size                | 10 | Explain how the study size was arrived at                                                                                                                                            | This study was about coping with trauma and mental health in individuals with visual impairment. Sample size was calculated with regard to the number of participants needed to examine the prevalence and consequences of trauma-related outcomes like post-traumatic stress disorder. |
| Quantitative variables    | 11 | Explain how quantitative variables were handled in the analyses. If applicable, describe which groupings were chosen                                                                 | Page 8                                                                                                                                                                                                                                                                                  |



1  
2  
3  
4  
5  
6  
7  
8  
9  
10  
11  
12  
13  
14  
15  
16  
17  
18  
19  
20  
21  
22  
23  
24  
25  
26  
27  
28  
29  
30  
31  
32  
33  
34  
35  
36  
37  
38  
39  
40  
41  
42  
43  
44  
45  
46  
47

|                     |     |                                                                                                                                                                                                                                                                                                           |                                                                                                                                                                                 |
|---------------------|-----|-----------------------------------------------------------------------------------------------------------------------------------------------------------------------------------------------------------------------------------------------------------------------------------------------------------|---------------------------------------------------------------------------------------------------------------------------------------------------------------------------------|
|                     |     | and why                                                                                                                                                                                                                                                                                                   |                                                                                                                                                                                 |
| Statistical methods | 12  | (a) Describe all statistical methods, including those used to control for confounding                                                                                                                                                                                                                     | Page 8                                                                                                                                                                          |
|                     |     | (b) Describe any methods used to examine subgroups and interactions                                                                                                                                                                                                                                       | Page 8                                                                                                                                                                          |
|                     |     | (c) Explain how missing data were addressed                                                                                                                                                                                                                                                               | We were not able to address the possible impact of missing data. However, on page 13, we described our sample in its relation to census data of people with visual impairments. |
|                     |     | (d) <i>Cohort study</i> —If applicable, explain how loss to follow-up was addressed<br><i>Case-control study</i> —If applicable, explain how matching of cases and controls was addressed<br><i>Cross-sectional study</i> —If applicable, describe analytical methods taking account of sampling strategy | —                                                                                                                                                                               |
|                     |     | (e) Describe any sensitivity analyses                                                                                                                                                                                                                                                                     | —                                                                                                                                                                               |
| <b>Results</b>      |     |                                                                                                                                                                                                                                                                                                           |                                                                                                                                                                                 |
| Participants        | 13* | (a) Report numbers of individuals at each stage of study—eg numbers potentially eligible, examined for eligibility, confirmed eligible, included in the study, completing follow-up, and analysed                                                                                                         | Page 5                                                                                                                                                                          |
|                     |     | (b) Give reasons for non-participation at each stage                                                                                                                                                                                                                                                      | Supplementary material, Figure S1                                                                                                                                               |
|                     |     | (c) Consider use of a flow diagram                                                                                                                                                                                                                                                                        | Supplementary material, Figure S1                                                                                                                                               |
| Descriptive data    | 14* | (a) Give characteristics of study participants (eg demographic, clinical, social) and information on exposures and potential confounders                                                                                                                                                                  | Page 10 and Supplementary, Table S1                                                                                                                                             |
|                     |     | (b) Indicate number of participants with missing data for each variable of interest                                                                                                                                                                                                                       | We had no missing data due to non-response                                                                                                                                      |
|                     |     | (c) <i>Cohort study</i> —Summarise follow-up time (eg, average and total amount)                                                                                                                                                                                                                          |                                                                                                                                                                                 |

|                |     |                                                                                                                                                                                                              |                                                                                                                                                                                                                                                   |
|----------------|-----|--------------------------------------------------------------------------------------------------------------------------------------------------------------------------------------------------------------|---------------------------------------------------------------------------------------------------------------------------------------------------------------------------------------------------------------------------------------------------|
| Outcome data   | 15* | <i>Cohort study</i> —Report numbers of outcome events or summary measures over time                                                                                                                          |                                                                                                                                                                                                                                                   |
|                |     | <i>Case-control study</i> —Report numbers in each exposure category, or summary measures of exposure                                                                                                         |                                                                                                                                                                                                                                                   |
|                |     | <i>Cross-sectional study</i> —Report numbers of outcome events or summary measures                                                                                                                           | Table 2 and page 12                                                                                                                                                                                                                               |
| Main results   | 16  | (a) Give unadjusted estimates and, if applicable, confounder-adjusted estimates and their precision (eg, 95% confidence interval). Make clear which confounders were adjusted for and why they were included | Page 11 and 12                                                                                                                                                                                                                                    |
|                |     | (b) Report category boundaries when continuous variables were categorized                                                                                                                                    | “The GLMs were either unadjusted or adjusted for age (years: 18–35, 36–50, 51–65, ≥ 66), gender, education (years: < 11, 11-13, ≥ 14), and VI severity (moderate VI, severe VI, blindness, undetermined VI).”<br>Page 8                           |
|                |     | (c) If relevant, consider translating estimates of relative risk into absolute risk for a meaningful time period                                                                                             | —                                                                                                                                                                                                                                                 |
| Other analyses | 17  | Report other analyses done—eg analyses of subgroups and interactions, and sensitivity analyses                                                                                                               | No risk ratio modifications were observed of age or gender with each of the VI-specific factors ( $p > 0.05$ ).<br><br>“No risk ratio modifications were found of sexual assault with each of the possible confounding factors, neither for self- |

1  
2  
3  
4  
5  
6  
7  
8  
9  
10  
11  
12  
13  
14  
15  
16  
17  
18  
19  
20  
21  
22  
23  
24  
25  
26  
27  
28  
29  
30  
31  
32  
33  
34  
35  
36  
37  
38  
39  
40  
41  
42  
43  
44  
45  
46  
47

|                   |    |                                                          |                                                                                                                                                                                                                                                                                                                                                                                                                                                                                                                                                                         |
|-------------------|----|----------------------------------------------------------|-------------------------------------------------------------------------------------------------------------------------------------------------------------------------------------------------------------------------------------------------------------------------------------------------------------------------------------------------------------------------------------------------------------------------------------------------------------------------------------------------------------------------------------------------------------------------|
|                   |    |                                                          | efficacy nor life satisfaction (p > 0.05)." Page 8                                                                                                                                                                                                                                                                                                                                                                                                                                                                                                                      |
| <b>Discussion</b> |    |                                                          |                                                                                                                                                                                                                                                                                                                                                                                                                                                                                                                                                                         |
| Key results       | 18 | Summarise key results with reference to study objectives | <p>"The results from this cross-sectional study showed a higher prevalence of people in the VI population being exposed to sexual assaults such as being raped and forced into sexual acts compared to that in the general population, reaching statistical significance for women only. In the population of people with VI, the risk of sexual assaults was particularly high among individuals having other impairments in addition to their vision loss. Lastly, individuals with VI who had been assaulted sexually had lower levels of self-efficacy and life</p> |

For peer review only

|                          |    |                                                                                                                                                                            |                                                                             |
|--------------------------|----|----------------------------------------------------------------------------------------------------------------------------------------------------------------------------|-----------------------------------------------------------------------------|
|                          |    |                                                                                                                                                                            | satisfaction compared with the reference of no sexual assaults.”<br>Page 12 |
| Limitations              | 19 | Discuss limitations of the study, taking into account sources of potential bias or imprecision. Discuss both direction and magnitude of any potential bias                 | Page 12 and 13                                                              |
| Interpretation           | 20 | Give a cautious overall interpretation of results considering objectives, limitations, multiplicity of analyses, results from similar studies, and other relevant evidence | Page 2                                                                      |
| Generalisability         | 21 | Discuss the generalisability (external validity) of the study results                                                                                                      | Page 13                                                                     |
| <b>Other information</b> |    |                                                                                                                                                                            |                                                                             |
| Funding                  | 22 | Give the source of funding and the role of the funders for the present study and, if applicable, for the original study on which the present article is based              | Page 17                                                                     |

\*Give information separately for cases and controls in case-control studies and, if applicable, for exposed and unexposed groups in cohort and cross-sectional studies.

**Note:** An Explanation and Elaboration article discusses each checklist item and gives methodological background and published examples of transparent reporting. The STROBE checklist is best used in conjunction with this article (freely available on the Web sites of PLoS Medicine at <http://www.plosmedicine.org/>, Annals of Internal Medicine at <http://www.annals.org/>, and Epidemiology at <http://www.epidem.com/>). Information on the STROBE Initiative is available at [www.strobe-statement.org](http://www.strobe-statement.org).

# BMJ Open

## Sexual assaults in individuals with visual impairment: A cross-sectional study of a Norwegian sample

|                                 |                                                                                                                                            |
|---------------------------------|--------------------------------------------------------------------------------------------------------------------------------------------|
| Journal:                        | <i>BMJ Open</i>                                                                                                                            |
| Manuscript ID                   | bmjopen-2018-021602.R1                                                                                                                     |
| Article Type:                   | Research                                                                                                                                   |
| Date Submitted by the Author:   | 03-Apr-2018                                                                                                                                |
| Complete List of Authors:       | Brunes, Audun; Norwegian Centre for Violence and Traumatic Stress Studies<br>Heir, Trond; Ullevål University Hospital / University of Oslo |
| <b>Primary Subject Heading</b>: | Epidemiology                                                                                                                               |
| Secondary Subject Heading:      | Mental health, Public health, Sexual health                                                                                                |
| Keywords:                       | Rape and sexual assault, visual impairment, blindness, self-efficacy, life satisfaction                                                    |
|                                 |                                                                                                                                            |

SCHOLARONE™  
Manuscripts

Peer review only

1  
2  
3 **Sexual assaults in individuals with visual impairment: A cross-**  
4  
5  
6 **sectional study of a Norwegian sample**  
7  
8  
9

10  
11 **Audun Brunes<sup>1</sup>, Trond Heir<sup>1,2</sup>**  
12

13  
14  
15  
16 <sup>1</sup>Norwegian Centre for Violence and Traumatic Stress Studies, PB 181 Nydalen, NO-0409  
17  
18 Oslo, Norway.

19  
20 <sup>2</sup>Institute of Clinical Medicine, Faculty of Medicine, University of Oslo, P.O. Box 1171  
21  
22 Blindern, NO-0318 Oslo, Norway  
23

24  
25  
26 **Corresponding author:**  
27

28  
29 Audun Brunes, Norwegian Centre for Violence and Traumatic Stress Studies,  
30  
31 PB 181 Nydalen, NO-0409 Oslo. E-mail: [audun.brunes@nkvts.no](mailto:audun.brunes@nkvts.no). Phone: +47 97578629  
32  
33

34  
35 Word count excluding title page: 3803  
36

37 Abstract: 274  
38

39 References: 39  
40

41 Figures: 1  
42

43 Tables: 2  
44  
45  
46  
47  
48  
49  
50  
51  
52  
53  
54  
55  
56  
57  
58  
59  
60

## ABSTRACT

**Objective:** To examine the prevalence of sexual assaults among individuals with visual impairment (VI) compared to the general population, and to investigate the association between sexual assault and outcomes of self-efficacy and life satisfaction.

**Design:** Cross-sectional interview-based study conducted between February and May, 2017.

**Participants:** A probability sample of adults with VI ( $\geq 18$  years) who were members of the Norwegian Association of the Blind and Partially Sighted. A total of 736 (61%) members participated, of whom 55% were of female gender. We obtained norm data for sexual assaults from a representative survey of the general Norwegian population.

**Outcome measures:** Sexual assaults (Life Event Checklist for DSM-5), self-efficacy (General Self Efficacy Scale), and life satisfaction (Cantril's Ladder of Life Satisfaction).

**Results:** The prevalence of sexual assaults (rape, attempted rape, and forced into sexual acts) in the VI population was 17.4% (95% confidence interval (CI): 14.0–21.4) among women and 2.4% (95% CI: 1.2–4.7) among men. For women, the VI population had higher rates of sexual assaults across age strata than the general population. For men, no significant differences were found. In the population of people with VI, the risk of sexual assault was greater for those having other impairments in addition to the vision loss. Individuals with VI who experienced sexual assaults had lower levels of self-efficacy (Adjusted relative risk (ARR): 0.18, 95% CI: 0.05–0.61) and life satisfaction (ARR: 0.31, 95% CI: 0.19–0.50) than others.

**Conclusions:** The risk of experiencing sexual assault appears to be higher in individuals with VI than in the general population. Preventive measures as well as psychosocial care for those who have been exposed are needed.

**Keywords:** blindness; life satisfaction; rape; self-efficacy; sexual assault; visual impairment

### Strengths and limitations of this study

- A large probability sample of people with visual impairments made it possible to address the prevalence of sexual assaults within age groups.
- Use of interview-based assessments with validated instruments and detailed information about characteristics of visual impairment.
- The representativeness of the study sample is questionable as participants were recruited from a membership organization of blind and partially sighted.
- The findings should be interpreted in light of the possible impact of bias due to non-participation, recall and self-disclosure.



## INTRODUCTION

Sexual assault – which in this study refers to forms of violence such as rape and forced sexual acts – is shown to be a strong determinant of people's health and well-being.[1-3] Sexual transmittable infections and unwanted pregnancies are common among those who have been sexually assaulted[4] and about half of the reported cases involve physical injury.[5] Sexual assault is largely about power and oppression, and is being viewed today as a social problem with structural and cultural roots.[6] So far, sexual assault research has focused primarily on women,[7] while less is known about marginalized groups such as men having sex with men[8] and people with specific impairments.[9, 10]

Visual impairment (VI) is defined as functional restrictions of the visual system.[11] According to the World Health Organization (WHO) categorization system,[12] a diagnosis of VI is set through direct assessments of visual acuity and visual field, and classified into moderate to severe VI, blindness, and undetermined VI. VI is a heterogeneous condition occurring at any point in life, and has a diverse set of causes, severities, and progression rates.[13, 14] Furthermore, the majority of people with VI have other impairments in addition to their vision loss, being closely connected to conditions such as cerebral palsy, multiple sclerosis, diabetes and hearing impairment.[15-17]

A few observational studies from Europe and the US have been published on the prevalence of sexual assault in people with low vision or blindness.[18-22] In the previous studies, the reported lifetime prevalence of sexual assault or abuse has varied, with estimates ranging between 11% and 30%.[18, 19, 21, 22] The varying estimates may be attributed to a number of methodological factors, but it could also be related to the inclusion of samples with different types and degrees of vision loss. However, limited evidence exists on the extent of sexual assault across subgroups of people with various VI characteristics,[18] and more research is therefore needed.

1  
2  
3 Given the uncertainty about the prevalence of sexual assaults in people with VI and its  
4 possible associations with various VI characteristics, we conducted a cross-sectional study by  
5 including a probability sample of adults with VI. The study had the following three main  
6  
7 aims: (1) to estimate the prevalence of sexual assaults compared to the general population, (2)  
8  
9 to examine the association of sexual assaults with VI-related characteristics, and (3) to  
10  
11 examine the association between sexual assaults and outcomes of self-efficacy and life  
12  
13 satisfaction.  
14  
15  
16  
17  
18  
19

## 20 **METHODS**

### 21 **Visual impairment population**

22  
23 This cross-sectional study comprised adult members ( $\geq 18$  years) of the Norwegian  
24 Association of the Blind and Partially Sighted who had a diagnosis of VI. The organization  
25  
26 has about 10,000 members,[23] encompassing 0.2% of the Norwegian population. To ensure  
27  
28 adequate number of participants in the younger age groups, simple random sampling was  
29  
30 performed within each of the following four age strata: 18–35, 36–50, 51–65, and  $\geq 66$ . Data  
31  
32 were collected through structured telephone interviews in the time period between February 1  
33  
34 and May 31, 2017, by a private survey company. A total of 1216 adults were contacted, and  
35  
36 736 (61%) participated by completing the interview. The online supplement includes a flow  
37  
38 chart of the sample selection (Figure S1) and a detailed description of characteristics within  
39  
40 each degree of VI (Table S1).  
41  
42  
43  
44  
45  
46  
47

### 48 **General population**

49  
50 Norm data were based on the Norwegian Population Study (NorPop), a cross-sectional survey  
51  
52 including a representative sample of adults ( $\geq 18$  years) from the general Norwegian  
53  
54 population.[24] Simple random sampling was conducted based on names and addresses from  
55  
56

1  
2  
3 the Central National Register of Norway, and efforts were made to ensure that the sample  
4 reflected the Norwegian population in terms of age, gender, and geographical location. The  
5 study data were collected by postal questionnaires in the period between 2014 and 2015. Of  
6  
7 the 5500 eligible participants, nine persons had died, 21 were not able to fill out the  
8  
9 questionnaire, and 499 envelopes had non-valid addresses. This resulted in a total of 4971  
10  
11 individuals, and 1792 (36%) of those participated by completing and returning the postal  
12  
13 questionnaire.  
14  
15  
16  
17  
18  
19

## 20 **Measurements**

### 21 Covariates

22  
23 In both surveys, sociodemographic data included age (years: 18–35, 36–50, 51–65,  $\geq 66$ ),  
24  
25 gender, urbanicity (inhabitants:  $< 20,000$ ,  $\geq 20,000$ ), current education level (years:  $< 11$ , 11–  
26  
27 13,  $\geq 14$ ), work status (unemployed, employed/under education, retired), and marital status  
28  
29 (single, married/partner, divorced, widowed).  
30  
31

32  
33 Participants with VI were asked to report their corrected degree of VI in the better-  
34  
35 seeing eye (blind, severe VI, moderate VI, undetermined), progression rate of vision loss  
36  
37 (stable, progressive), and total years lived with VI. A ‘age of VI onset’ variable was created  
38  
39 by dividing the participants’ age by their reporting on years lived with VI. The variable was  
40  
41 then categorized into: ‘since birth (0 years)’, ‘childhood/youth (1–24 years)’, and ‘adulthood  
42  
43 ( $\geq 25$  years)’. Furthermore, the participants were asked to describe whether they had other  
44  
45 impairments in addition to their VI. The response alternatives were: ‘no’, ‘yes, to some  
46  
47 extent’, and ‘yes, to a great extent’. Participants who reported impairment to some or great  
48  
49 extent were included in the ‘yes’ category, while those who reported having no other  
50  
51 impairments were included in the ‘no’ category.  
52  
53  
54  
55  
56  
57  
58  
59  
60

### Sexual assaults

In both surveys, past experience of sexual assaults was measured by the Life Event Checklist for DSM-5 (LEC-5). The questionnaire has demonstrated adequate test-retest reliability and moderate correlation with trauma-related mental disorders.[25] In the list of life events, participants were asked to describe whether they had experienced sexual assaults (rape, attempted rape, made to perform any type of sexual act through force or threat of harm). Those who reported 'that happened me' were categorized as 'yes' (1) and those who reported otherwise were categorized as 'no' (0).

### Self-efficacy

The General Self Efficacy Scale (GSE scale) was included to assess perception of self-efficacy in the VI population. The Norwegian version of the GSE scale has been shown to have a high test-retest reliability ( $r = 0.82$ ) and acceptable correlations with life satisfaction ( $r = 0.26$ ) and positive affect ( $r = 0.40$ ).[26] The scale consists of 10 statements about the participant's belief in one's ability to adequately respond to novel or challenging situations and to cope with a variety of stressors, and is scored on a 4-point Likert scale from 1 (not at all true) to 4 (exactly true). A sum score was calculated based on all 10 items, with higher scores representing greater self-efficacy. The sum score was treated as an untransformed continuous variable in our main analyses. The GSE scale had a Chronbach's alpha of 0.89.

### Life satisfaction

Cantril's Ladder of Life Satisfaction (CLLS) was used to measure current life satisfaction in the VI population.[27] The participants were asked to imagine themselves a ladder with 10 steps, of which the bottom of the ladder represented the worst possible life for them (a score

1  
2  
3 of 0) and the top of the ladder represented the best possible life for them (a score of 10). The  
4  
5 scale was treated as an untransformed continuous variable in the regression analyses.  
6  
7

## 8 9 **Statistical methods**

10  
11 We assessed the lifetime prevalence of sexual assaults in the VI population and in the general  
12  
13 population within strata of age and gender. All stratified proportions were estimated with  
14  
15 corresponding 95% exact binomial confidence intervals (CIs). Test of statistical significance  
16  
17 was performed using Fisher's exact test.  
18

19  
20 We used generalized linear models (GLMs) with Binomial distribution and log-link  
21  
22 function to estimate RRs and 95% CIs of sexual assaults in its association with each VI-  
23  
24 specific factor (VI severity, age of VI onset, VI stability, and having other impairments).  
25  
26 Model fit was evaluated using residual plots. The models were either unadjusted or age- and  
27  
28 gender-adjusted. No risk ratio modifications were observed of age or gender with each of the  
29  
30 VI-specific factors ( $p > 0.05$ ).  
31

32  
33 GLM with Gaussian distribution and identity-link function was used to estimate mean  
34  
35 scores of self-efficacy and life satisfaction of those who had experienced sexual assaults,  
36  
37 compared with the reference of no sexual assaults. Model estimates were presented in terms  
38  
39 of RRs and 95% CIs. Model fit was evaluated using residual plots. The GLMs were either  
40  
41 unadjusted or adjusted for age (years: 18–35, 36–50, 51–65,  $\geq 66$ ), gender, education (years:  
42  
43  $< 11$ , 11–13,  $\geq 14$ ), and VI severity (moderate VI, severe VI, blindness, undetermined VI). No  
44  
45 risk ratio modifications were found of sexual assault with each of the possible confounding  
46  
47 factors ( $p > 0.05$ ).  
48

49  
50 The significance level was set at  $p = 0.05$ . The statistical analyses were carried out  
51  
52 using Stata Version 14 (Stata Corp., Texas, USA).  
53  
54

### **Patient and public involvement**

The study was planned by an expert group, consisting of researchers on disability, rehabilitation personnel and board members from the Norwegian Association of the Blind and Partially Sighted. Most participants had personal experiences as they themselves were visually impaired or blind. Dissemination of findings to members of the Norwegian Association of the Blind and Partially Sighted will be arranged via different channels. The work will be published in open access peer-reviewed journals so that all members have opportunity to read the articles. Furthermore, we will have a direct communication with the organization to provide results of key relevance to the organization and holding presentations to members on request. We will also work together with the organization to reach media through press releases and to reach stakeholders through policy briefs.

### **Ethics**

The study was carried out anonymously and at request the Regional Committee for Medical and Health Research Ethics required no further formal ethical approval (Reference number: 2016/1615A). All participants gave their informed consent for taking part in the study. Study participation was voluntarily, and the participants were informed that they could withdraw from the study at any time.

### **RESULTS**

Table 1 shows the study characteristics of the VI population and the general population. The age distribution of the VI population (mean: 51.4, range: 18–95) was similar to that of the general population (mean: 53.2, range: 18–94). In both surveys, non-participants were more likely than participants to be of young or old age.

1  
2  
3 A total of 78 (10.6%, 95% CI: 8.5–13.1) of adults with VI and 109 (6.1%, 95% CI:  
4 5.1–7.3) of adults from the general population reported having at some time experienced  
5 sexual assaults. Table 2 displays the prevalence rates of sexual assaults across strata of age  
6 and gender. For women, a higher prevalence of sexual assaults was observed among  
7 individuals with VI than that of the general population, and the largest difference was found  
8 among those aged 36 to 50 years. For men, no significant differences were observed. The  
9 female/male ratio was 7.3 for the VI population and 5.9 for the general population.  
10  
11  
12  
13  
14  
15  
16  
17

18 Figure 1 displays the unadjusted and age- and gender-adjusted risk of sexual assaults  
19 for VI-related characteristics in the VI population. Individuals with other impairments in  
20 addition to their vision loss had a greater risk of experiencing sexual assaults (RR: 1.71, 95%  
21 CI: 1.15–2.55) than individuals who did not have any other impairments. No significant  
22 associations were found with other VI-related factors.  
23  
24  
25  
26  
27  
28  
29  
30  
31  
32  
33  
34  
35  
36  
37  
38  
39  
40  
41  
42  
43  
44  
45  
46  
47  
48  
49  
50  
51  
52  
53  
54  
55  
56  
57  
58  
59  
60

**Table 1.** Characteristics of the VI population and the GP population, according to gender.

|                                         | <b>Female VI</b> | <b>Female GP</b> | <b>Male VI</b>   | <b>Male GP</b>   |
|-----------------------------------------|------------------|------------------|------------------|------------------|
|                                         | <b>(n = 403)</b> | <b>(n = 941)</b> | <b>(n = 333)</b> | <b>(n = 828)</b> |
| <b>Characteristics</b>                  | <b>n (%)</b>     | <b>n (%)</b>     | <b>n (%)</b>     | <b>n (%)</b>     |
| <b>Age:</b> 18–35 years                 | 88 (21.8)        | 189 (20.1)       | 69 (20.7)        | 105 (12.7)       |
| 36–50 years                             | 101 (25.1)       | 273 (28.9)       | 85 (25.5)        | 184 (22.2)       |
| 51–65 years                             | 106 (26.3)       | 267 (28.4)       | 94 (28.2)        | 286 (34.5)       |
| ≥ 66 years                              | 108 (26.8)       | 212 (22.5)       | 85 (25.5)        | 253 (30.6)       |
| <b>Urbanicity:</b> < 20,000 inhabitants | 227 (56.3)       | 444 (47.3)       | 172 (51.7)       | 399 (48.9)       |
| ≥ 20,000 inhabitants                    | 176 (43.7)       | 494 (52.7)       | 161 (48.4)       | 426 (51.1)       |
| <b>Education:</b> < 11 years            | 69 (17.1)        | 79 (8.4)         | 46 (13.8)        | 62 (7.5)         |
| 11–13 years                             | 162 (40.2)       | 346 (36.7)       | 124 (37.2)       | 336 (40.5)       |
| ≥ 14 years                              | 172 (42.7)       | 517 (54.9)       | 163 (49.0)       | 432 (52.0)       |
| <b>Work status:</b> Employed/studying   | 154 (38.2)       | 641 (68.3)       | 160 (48.1)       | 526 (63.1)       |
| Unemployed                              | 152 (37.7)       | 82 (8.7)         | 73 (21.9)        | 60 (7.2)         |
| Retired                                 | 97 (24.1)        | 216 (23.0)       | 100 (30.0)       | 224 (29.3)       |
| <b>Marital status:</b> Single           | 131 (32.5)       | 133 (14.2)       | 129 (38.7)       | 96 (11.6)        |
| Married/partnership                     | 181 (44.9)       | 698 (74.3)       | 166 (49.9)       | 672 (80.9)       |
| Divorced                                | 46 (11.4)        | 59 (6.2)         | 25 (7.5)         | 38 (4.6)         |
| Widowed                                 | 45 (11.2)        | 49 (5.2)         | 13 (3.9)         | 25 (3.0)         |

*Note.* VI = visual impairment; GP = general population.



**Table 2.** Prevalence of sexual assaults in the VI population and in the GP population, according to age and gender.

|                   | Female VI (n = 403)† |                  | Female GP (n = 941)† |                 | p-value#  | Male VI (n = 333)† |                | Male GP (n = 828)† |               | p-value# |
|-------------------|----------------------|------------------|----------------------|-----------------|-----------|--------------------|----------------|--------------------|---------------|----------|
|                   | Cases/tot            | % (95% CI)       | Cases/tot            | % (95% CI)      |           | Cases/tot          | % (95% CI)     | Cases/tot          | % (95% CI)    |          |
| <b>Age groups</b> |                      |                  |                      |                 |           |                    |                |                    |               |          |
| 18–35 years       | 15/88                | 17.1 (10.5–26.5) | 22/189               | 11.6 (7.8–17.1) | p = 0.26  | 1/69               | 1.5 (0.2–9.7)  | 1/105              | 1.0 (0.1–6.5) | P = 1.00 |
| 36–50 years       | 26/101               | 25.7 (18.1–35.2) | 31/273               | 11.4 (8.1–15.7) | p = 0.001 | 4/85               | 4.7 (1.8–12.0) | 3/184              | 1.6 (0.5–5.0) | P = 0.21 |
| 51–65 years       | 17/106               | 16.0 (10.2–24.4) | 28/267               | 10.5 (7.3–14.8) | p = 0.16  | 2/94               | 2.1 (0.5–8.2)  | 6/286              | 2.1 (0.9–4.6) | P = 1.00 |
| ≥ 66 years        | 12/108               | 11.1 (6.4–18.6)  | 13/212               | 6.1 (3.6–10.3)  | p = 0.13  | 1/85               | 1.2 (0.2–8.0)  | 4/253              | 1.6 (0.6–4.1) | P = 1.00 |
| <b>Total</b>      | 70/403               | 17.4 (14.0–21.4) | 94/941               | 10.0 (8.3–12.1) | p < 0.001 | 8/333              | 2.4 (1.2–4.7)  | 14/828             | 1.7 (1.0–2.8) | P = 0.48 |

Notes. CI = confidence intervals; VI = visual impairment; GP = general population; tot = total number of participants in that particular subgroup;

# = p-value calculated using Fisher's exact test;

† = no missing data due to non-response for the VI population, while there were 23 participants from the general population who did not respond to questions related to age and/or gender.

1  
2  
3 In individuals with VI who had experienced sexual assaults, the mean scores (standard  
4 deviation, SD) were 29.8 (5.7) for self-efficacy and 5.8 (2.3) for life satisfaction. In  
5  
6 individuals with VI who had not experience any sexual assaults, the mean scores (SD) were  
7  
8 31.7 (5.0) for self-efficacy and 6.9 (1.9) for life satisfaction. Results from the unadjusted  
9  
10 GLMs showed that those who had been exposed to sexual assault had lower levels of self-  
11  
12 efficacy (RR: 0.21, 95% CI: 0.07–0.64) and life satisfaction (RR: 0.31, 95% CI: 0.19–0.50)  
13  
14 compared with those who had not been sexually assaulted. After adjusting for age, gender,  
15  
16 education and VI severity, the associations remained statistically significant for both self-  
17  
18 efficacy (RR: 0.18, 95% CI: 0.05–0.61) and life satisfaction (RR: 0.33, 95% CI: 0.20–0.53).  
19  
20  
21  
22  
23

24 ---Figure 1 about here---

## 25 26 27 28 **DISCUSSION**

29  
30 The results from this cross-sectional study showed a higher prevalence of people in the VI  
31  
32 population being exposed to sexual assaults such as being raped and forced into sexual acts  
33  
34 compared to that in the general population, reaching statistical significance for women only.  
35  
36 In the population of people with VI, the risk of sexual assaults was particularly high among  
37  
38 individuals having other impairments in addition to their vision loss. Lastly, individuals with  
39  
40 VI who had been assaulted sexually had lower levels of self-efficacy and life satisfaction  
41  
42 compared with the reference of no sexual assaults.  
43  
44  
45  
46  
47

### 48 **Strengths and limitations**

49  
50 This is one of few studies addressing the prevalence and associated factors of sexual assaults  
51  
52 by including a probability sample of adults with VI,[19] and extends previous research by  
53  
54 obtaining valid estimates of sexual assaults across a broad array of age groups and including  
55  
56  
57  
58  
59  
60

1  
2  
3 data obtained from the general population. Other study strengths are the detailed description  
4  
5 of important VI characteristics and the use of interview-based assessments with validated  
6  
7 instruments.

8  
9 The cross-sectional observational study design limited the possibility to address  
10  
11 relationships of cause and effect, and, although we have controlled for some potentially  
12  
13 confounding factors, it is plausible that our analyses are subjected to residual confounding. In  
14  
15 addition, there may be differences in what people perceive or define as sexual assault. We  
16  
17 believe that the specific examples of violent behaviours included in the study question made it  
18  
19 easier for people to grasp what is meant by sexual assaults. Furthermore, the use of self-  
20  
21 reports may have affected the accuracy and validity of the estimates, and the prevalence of  
22  
23 sexual assaults could be underestimated as a function of response biases like recall bias and  
24  
25 self-disclosure bias. Data on sexual assaults were obtained by telephone interviews in the VI  
26  
27 population and by postal survey in the general population. Reviews of the literature suggest  
28  
29 higher rates of sensitive information when reported by questionnaires than by interviews.[28,  
30  
31 29] Thus, the observed difference between people with VI and the general population may be  
32  
33 a conservative estimate.  
34  
35

36  
37 As in most studies focusing on sensitive topics,[29] the high rates of people declining  
38  
39 to participate from the VI population and the general population may have introduced biased  
40  
41 estimates. We believe that the bias of sample selection have primarily affected the frequencies  
42  
43 of sexual assaults and other covariates and to a lesser extent the relationships of interest.[30]  
44  
45 Lastly, inclusion of participants from a membership organization of blind and visually  
46  
47 impaired people questions the representativeness of our study sample. Our study sample is  
48  
49 comparable to 2015 census data of people who had vision difficulties with regard to gender,  
50  
51 occupational status and geographical location, while we included a higher percentage of  
52  
53 people having higher education and living alone.[31]  
54  
55

### **Relation to other studies**

The lifetime prevalence of sexual assaults in our study population is either equal to or lower than what has been found in comparable studies of blind and visually impaired populations in the US (12%)[19] or in Norway (18%).[18] Furthermore, the results from our study are partly in agreement with the hypothesis of VI as a risk factor for experiencing serious forms of sexual violence.[18] However, the low number of cases among men makes it difficult to draw inferences for the male population.

Our results of higher rates of sexual assaults in those having other functional impairments in addition to their VI illustrate that being markedly different from non-impaired people, and especially visibly different, may put individuals at risk of being exposed to certain forms of violence and abuse. Unlike the study by Kvam,[18] we did not observe any significant associations between age of VI onset and sexual assaults.

We found a lower lifetime prevalence of sexual assault in adults 51 years or older compared with younger age groups. This deserves to be commented as we expected a cumulative exposure to assaults with increasing age. In addition to the possibility of recall bias and differences across age cohorts in attitudes towards violence,[32] our findings may be explained by a high percentage of participants in older age groups who developed their VI in old age.[13]

### **Risk of sexual assault**

Individuals with VI may be at risk of sexual assaults for many reasons, being either specific to VI itself or related to having an impairment in general. First, many people with VI are known to have lower socioeconomic status and to be more prone to social isolation and dependency.[33] This makes it easier for a perpetrator to assert power and control over the

1  
2  
3 victim.[10] Being dependent on other people in care or service situations, which may be the  
4  
5 case especially for some of those having additional impairments, may provide for closeness  
6  
7 and intimacy.[10] Often, the perpetrator has a close relationship to the victim. It has been  
8  
9 found that nine in ten victims with VI were abused either by an acquaintance or a close  
10  
11 relative.[18] Important issues related to sexual violence are differences in power and control.  
12  
13 Negative social views towards people with impairments, like stigmatization and  
14  
15 discrimination, may be internalized by the individual, leading to low self-esteem and feelings  
16  
17 of self-blame.[34] Dependency, fear of being left alone, and feelings of unworthiness can  
18  
19 make people stay in a relationship that is potentially abusive.  
20  
21  
22  
23

### 24 **Self-efficacy and life satisfaction**

25  
26 To our knowledge, this is the first study addressing possible consequences of being exposed  
27  
28 to sexual violence among individuals with VI. Our findings of an association between sexual  
29  
30 assault and lower levels of self-efficacy or life satisfaction in adults with VI are similar to  
31  
32 what has been observed in the general population,[2, 35, 36] and may have similar plausible  
33  
34 explanations. Rape and forced sexual acts might cause deep-rooted consequences in various  
35  
36 life domains, such as role management and the ability to socialize.[37] Moreover, lower levels  
37  
38 of self-efficacy and life satisfaction could be due to the fact that traumatic events like rape  
39  
40 could affect people's view of themselves, others, and the world, as well as resulting in stress  
41  
42 reactions like avoidance, low self-esteem, negative cognition, and self-blaming.[38] Self-  
43  
44 efficacy is a key psychological component for restoring functioning and health after  
45  
46 experiencing trauma, and the ability to handle post-traumatic stress reactions is associated  
47  
48 with self-efficacy beliefs in the future.[36]  
49  
50  
51  
52  
53

### 54 **Implications**

1  
2  
3 The high prevalence of sexual assault in people with sensory impairments calls for preventive  
4 measures. Violence prevention strategies should try to raise public awareness, promote open  
5 discussion, and upgrade professional education, service support and guidance.[39] There is  
6 also a need for strategies that provide safe avenues through which people with VI can escape  
7 or recover after an assaulting event. Until now, few people with VI have prosecuted the  
8 perpetrator,[18] and measures to intensify the legal protection of people with VI should be  
9 addressed.

10  
11  
12  
13  
14  
15  
16  
17  
18 Violence is largely about power and oppression.[6] Impaired individuals' risk of  
19 serious forms of sexual violence may be rooted in social isolation and being of a low social  
20 position. Thus, social integration of people with impairments should be a main objective to  
21 make them more robust towards sexual assaults, which can be achieved through universal  
22 design of information and public spaces, reducing stigmatization and discrimination towards  
23 people with impairments, and fostering self-reliance and independency of the individual.

24  
25  
26  
27  
28  
29  
30  
31 Possible consequences of sexual assaults for self-efficacy and life satisfaction  
32 emphasize the need for professional assistance for those who have been abused. Access to  
33 help services are crucial, and adapted information and professionals trained to the needs and  
34 challenges of people with VI are recommended.

### 35 36 37 38 39 40 41 **Acknowledgement**

42 Thanks to Marianne Bang Hansen for her contribution to the study design and data collection.  
43 We also want to thank Sverre Fuglerud, Per Fosse, and Liv Berit Augestad for valuable  
44 insights into the lives of people who are blind and visually impaired. Lastly, we would like to  
45 thank the study expert group and all collaborating project partners in the European Network  
46 for Psychosocial Crisis Management - Assisting Disabled in Case of Disaster (EUNAD) for  
47 making it possible to conduct this research study.

**Conflict of interest statement**

None declared.

**Funding statement**

This work received grants from the European Commission, Directorate - General Humanitarian Aid and Civil Protection (Grant number: ECHO/SUB/2015/718665/PREP17).

**Author contributions**

A. Brunet planned the statistical analysis, analysed and interpreted the data, and drafted and revised the paper. T. Heir designed the research study, monitored data collection for the whole study, cleaned the data, interpreted the data, and drafted and revised the paper.

**Data sharing statement**

Data are from the research project European Network for Psychosocial Crisis Management - Assisting Disabled in Case of Disaster (EUNAD). Public availability may compromise privacy of the respondents. According to the informed consent given by each respondent, the data is to be stored properly and in line with the Norwegian Law of Privacy Protection. However, anonymized data is available to researchers who provide a methodological sound proposal in accordance with the informed consent of the respondents. Interested researchers can contact project leader Trond Heir ([trond.heir@medisin.uio.no](mailto:trond.heir@medisin.uio.no)) with request for our study data.

## References

1. Walsh K, Galea S, Koenen KC. Mechanisms underlying sexual violence exposure and psychosocial sequelae: a theoretical and empirical review. *Clin Psychol (New York)*. 2012;19(3):260–75. [DOI:10.1111/cpsp.12004]
2. Hughes K, Bellis MA, Hardcastle KA, et al. The effect of multiple adverse childhood experiences on health: a systematic review and meta-analysis. *Lancet Public Health*. 2017;2(8):356–66. [DOI:10.1016/S2468-2667(17)30118-4]
3. GBD 2015 Risk Factors Collaborators. Global, regional, and national comparative risk assessment of 79 behavioural, environmental and occupational, and metabolic risks or clusters of risks, 1990–2015: a systematic analysis for the Global Burden of Disease Study 2015. *Lancet*. 2016;388(10053):1659–724. [DOI:10.1016/S0140-6736(16)31679-8]
4. Welch J, Mason F. Rape and sexual assault. *BMJ*. 2007;334(7604):1154–8. [DOI:10.1136/bmj.39211.403970.BE]
5. Sugar NF, Fine DN, Eckert LO. Physical injury after sexual assault: findings of a large case series. *Am J Obstet Gynecol*. 2004;190(1):71–6.
6. Sokoloff NJ, Dupont I. Domestic violence at the intersections of race, class, and gender: challenges and contributions to understanding violence against marginalized women in diverse communities. *Violence Against Women*. 2005;11(1):38–64. [DOI:10.1177/1077801204271476]
7. Abrahams N, Devries K, Watts C, et al. Worldwide prevalence of non-partner sexual violence: a systematic review. *Lancet*. 2014;383(9929):1648–54. [DOI: 10.1016/S0140-6736(13)62243-6]
8. Rothman EF, Exner D, Baughman AL. The prevalence of sexual assault against people who identify as gay, lesbian, or bisexual in the United States: a systematic review. *Trauma Violence Abuse*. 2011;12(2):55–66. [DOI: 10.1177/1524838010390707]



- 1  
2  
3 9. Hughes K, Bellis MA, Jones L, et al. Prevalence and risk of violence against adults with  
4 disabilities: a systematic review and meta-analysis of observational studies. *Lancet*.  
5 2012;379(9826):1621–9. [DOI: 10.1016/S0140-6736(11)61851-5]  
6  
7  
8  
9 10. Plummer S-B, Findley PA. Women with disabilities' experience with physical and sexual  
10 abuse: review of the literature and implications for the field. *Trauma Violence Abuse*.  
11 2012;13(1):15–29. [DOI: 10.1177/1524838011426014]  
12  
13  
14  
15 11. Colenbrander A. Assessment of functional vision and its rehabilitation. *Acta Ophthalmol*.  
16 2010;88(2):163–73. [10.1111/j.1755-3768.2009.01670.x]  
17  
18  
19  
20 12. World Health Organization. International Classification of Diseases 10th revision: version  
21 2016: World Health Organization; 2018 [cited 2018-01-05]. Available from:  
22 <http://apps.who.int/classifications/icd10/browse/2016/en/>.  
23  
24  
25  
26 13. Pascolini D, Mariotti SP. Global estimates of visual impairment: 2010. *Br J Ophthalmol*.  
27 2012;96(5):614–8. [DOI: 10.1136/bjophthalmol-2011-300539]  
28  
29  
30  
31 14. Solebo AL, Rahi J. Epidemiology, aetiology and management of visual impairment in  
32 children. *Arch Dis Child*. 2014;99(4):375–9. [DOI: 10.1136/archdischild-2012-303002]  
33  
34  
35  
36 15. Rosenberg T, Flage T, Hansen E, et al. Incidence of registered visual impairment in the  
37 Nordic child population. *Br J Ophthalmol*. 1996;80(1):49–53.  
38  
39  
40 16. Rahi JS, Cumberland PM, Peckham CS. Improving detection of blindness in childhood:  
41 the British Childhood Vision Impairment study. *Pediatrics*. 2010;126(4):895–903. [DOI:  
42 10.1542/peds.2010-0498]  
43  
44  
45  
46 17. Court H, McLean G, Guthrie B, et al. Visual impairment is associated with physical and  
47 mental comorbidities in older adults: a cross-sectional study. *BMC Med*. 2014;12(1):1–8.  
48 [DOI: 10.1186/s12916-014-0181-7]  
49  
50  
51  
52  
53  
54  
55  
56  
57  
58  
59  
60

- 1  
2  
3 18. Kvam MH. Experiences of childhood sexual abuse among visually impaired adults in  
4 Norway: prevalence and characteristics. *Journal of Visual Impairment & Blindness*.  
5 2005;99(1):5–14.  
6  
7  
8  
9 19. Kelley SD, Moore J. Abuse and violence in the lives of people with low vision: a national  
10 survey. *RE:view*. 2000;31(4):155–64.  
11  
12  
13 20. Spencer N, Devereux E, Wallace A, et al. Disabling conditions and registration for child  
14 abuse and neglect: a population-based study. *Pediatrics*. 2005;116(3):609–13. [DOI:  
15 10.1542/peds.2004-1882]  
16  
17  
18 21. Pava WS. Visually impaired persons' vulnerability to sexual and physical assault. *Jornal*  
19 *of Visual Impairment & Blindness*. 1994;88(2):103–12.  
20  
21  
22 22. Rounds DL, Jr. Victimization of individuals with legal blindness: Nature and forms of  
23 victimization. *Behavioral Sciences & the Law*. 1996;14(1):29–40. [DOI: 10.1002/(SICI)1099-  
24 0798(199624)14:1<29::AID-BSL222>3.0.CO;2-8]  
25  
26  
27 23. The Norwegian Association of the Blind and Partially Sighted. Om Blindeforbundet  
28 [About the Norwegian Association of the Blind and Partially Sighted]. Available from:  
29 <https://www.blindeforbundet.no/om-blindeforbundet>.  
30  
31  
32 24. Schou-Bredal I, Heir T, Skogstad L, et al. Population-based norms of the Life Orientation  
33 Test–Revised (LOT-R). *International Journal of Clinical and Health Psychology*.  
34 2017;17(3):216–24. [DOI: 10.1016/j.ijchp.2017.07.005]  
35  
36  
37 25. Gray MJ, Litz BT, Hsu JL, et al. Psychometric properties of the life events checklist.  
38 *Assessment*. 2004;11(4):330–41. [DOI: 10.1177/1073191104269954]  
39  
40  
41 26. Leganger A, Kraft P, Røysamb E. Perceived self-efficacy in health behaviour research:  
42 conceptualisation, measurement and correlates. *Psychology and Health*. 2000;15(1):51–69.  
43 [DOI: 10.1080/08870440008400288]  
44  
45  
46 27. Cantril H. A study of aspirations. *Ekistics*. 1963;16(93):121–4.  
47  
48  
49  
50  
51  
52  
53  
54  
55  
56  
57  
58  
59  
60

- 1  
2  
3 28. Bowling A. Mode of questionnaire administration can have serious effects on data quality.  
4  
5 *J Public Health (Oxf)*. 2005;27(3):281–91. [DOI: 10.1093/pubmed/fdi031]  
6  
7 29. Tourangeau R, Yan T. Sensitive questions in surveys. *Psychol Bull*. 2007;133(5):859.  
8  
9 [DOI: 10.1037/0033-2909.133.5.859]  
10  
11 30. Rothman KJ, Gallacher JEJ, Hatch EE. Why representativeness should be avoided. *Int J*  
12  
13 *Epidemiol*. 2013;42(4):1012-4. [DOI: 10.1093/ije/dys223]  
14  
15 31. Statistics Norway. Statistikkbanken [Statistics Norway Databank] Oslo, Norway:  
16  
17 Statistics Norway. Available from: <https://www.ssb.no/statistikkbanken>.  
18  
19 32. Luoma M-L, Manderbacka C. Breaking the taboo: overview of research phase (Finland).  
20  
21 2008. Available from: [http://eige.europa.eu/gender-based-](http://eige.europa.eu/gender-based-violence/resources/finland/breaking-taboo-overview-research-phase-finland)  
22  
23 [violence/resources/finland/breaking-taboo-overview-research-phase-finland](http://eige.europa.eu/gender-based-violence/resources/finland/breaking-taboo-overview-research-phase-finland)  
24  
25 33. Lane M, Lane V, Abbott J, et al. Multiple deprivation, vision loss, and ophthalmic disease  
26  
27 in adults: global perspectives. *Surv Ophthalmol*. 2017. [DOI:  
28  
29 10.1016/j.survophthal.2017.10.009]  
30  
31 34. Hassouneh-Phillips D, McNeff E. “I thought I was less worthy”: Low sexual and body  
32  
33 esteem and increased vulnerability to intimate partner abuse in women with physical  
34  
35 disabilities. *Sex Disabil*. 2005;23(4):227–40. [DOI: 10.1007/s11195-005-8930-3]  
36  
37 35. Jumper SA. A meta-analysis of the relationship of child sexual abuse to adult  
38  
39 psychological adjustment. *Child Abuse Negl*. 1995;19(6):715–28.  
40  
41 36. Diehl AS, Prout MF. Effects of posttraumatic stress disorder and child sexual abuse on  
42  
43 self-efficacy development. *Am J Orthopsychiatry*. 2002;72(2):262–5.  
44  
45 37. Dillon G, Hussain R, Loxton D, et al. Mental and physical health and intimate partner  
46  
47 violence against women: a review of the literature. *Int J Family Med*. 2013:1–15. [DOI:  
48  
49 10.1155/2013/313909]  
50  
51  
52  
53  
54  
55  
56  
57  
58  
59  
60

1  
2  
3 38. American Psychiatric Association. Diagnostic and statistical manual of mental disorders,  
4 fifth edition (DSM-5). Washington, DC: American Psychiatric Pub 2013.

5  
6  
7 39. Brown H. Safeguarding adults and children with disabilities against abuse. Strasbourg:  
8 European Council of Europe 2003. Available from: <https://rm.coe.int/16805a297e>.

9  
10  
11  
12  
13  
14  
15  
16  
17  
18  
19  
20  
21  
22  
23  
24  
25  
26  
27  
28  
29  
30  
31  
32  
33  
34  
35  
36  
37  
38  
39  
40  
41  
42  
43  
44  
45  
46  
47  
48  
49  
50  
51  
52  
53  
54  
55  
56  
57  
58  
59  
60

For peer review only

1  
2  
3 **Figure 1.** Risk of sexual assault for various visual impairment (VI) characteristics in a  
4 population of people who are blind and visually impaired (n = 736); Results unadjusted (blue)  
5 and adjusted for age and gender (red).  
6  
7  
8  
9  
10  
11  
12  
13  
14  
15  
16  
17  
18  
19  
20  
21  
22  
23  
24  
25  
26  
27  
28  
29  
30  
31  
32  
33  
34  
35  
36  
37  
38  
39  
40  
41  
42  
43  
44  
45  
46  
47  
48  
49  
50  
51  
52  
53  
54  
55  
56  
57  
58  
59  
60

For peer review only

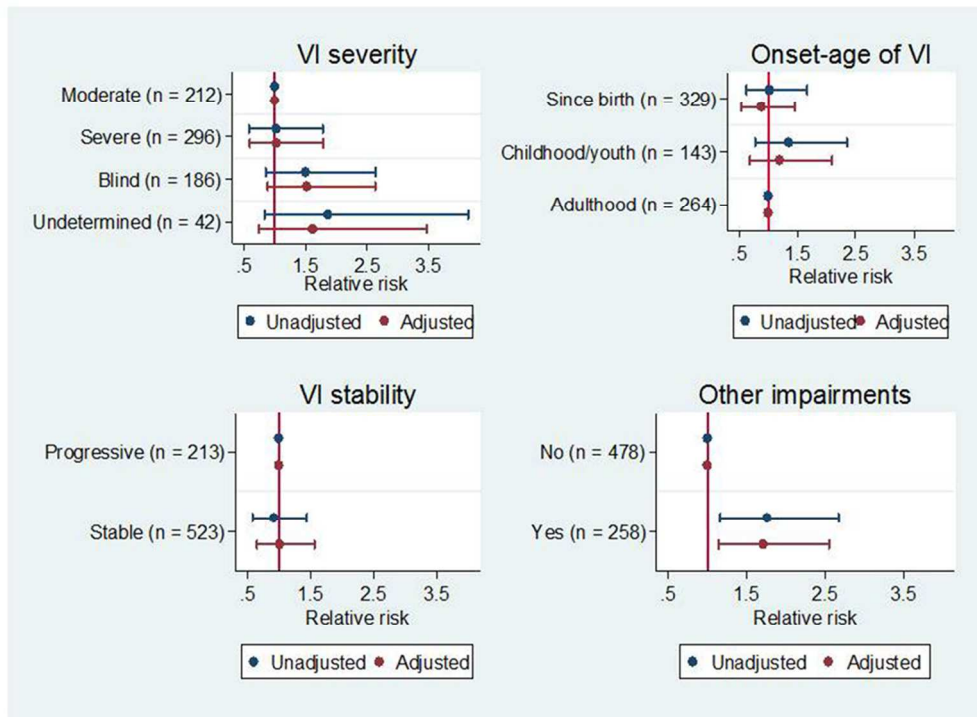

Figure1

449x329mm (300 x 300 DPI)

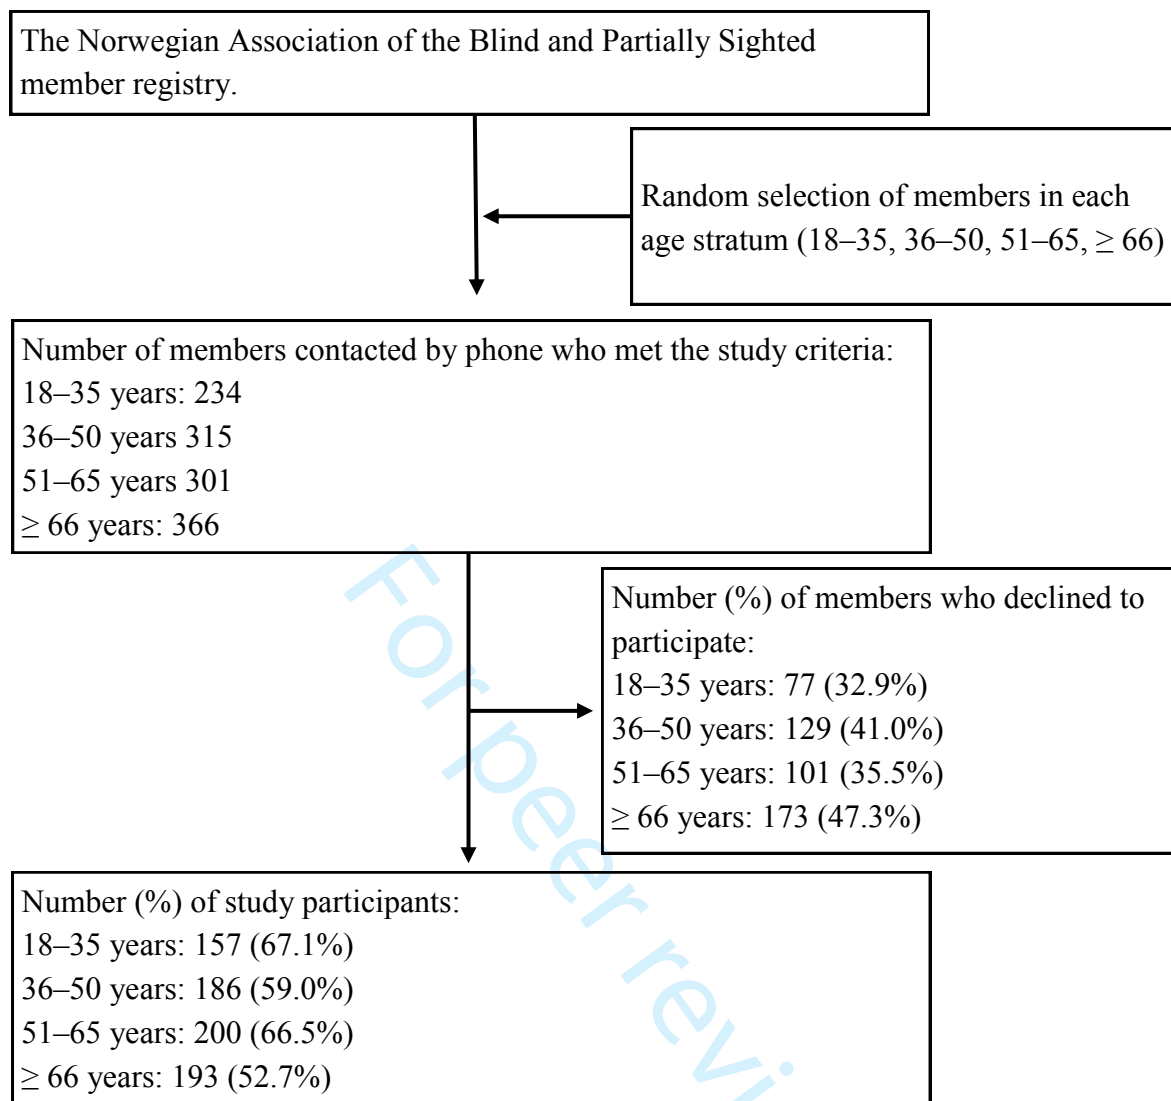

**Figure S1.** Selection of study participants.

**Table S1.** Study characteristics and VI-specific factors of the VI population, according to various degrees of vision loss (n = 736).

| Characteristics                        | VI severity# |             |             |              |
|----------------------------------------|--------------|-------------|-------------|--------------|
|                                        | Moderate VI  | Severe VI   | Blindness   | Undetermined |
| <b>Age (mean, SD)</b>                  | 53.6 (17.4)  | 48.3 (16.8) | 53.2 (16.7) | 54.9 (17.0)  |
| <b>Gender (n, %):</b> Women            | 130 (61.3)   | 152 (51.4)  | 96 (51.6)   | 25 (59.5)    |
| Men                                    | 82 (38.7)    | 144 (48.6)  | 90 (48.4)   | 17 (40.5)    |
| <b>Education (n, %):</b> < 11 years    | 40 (18.9)    | 36 (12.2)   | 33 (17.7)   | 6 (14.3)     |
| 11–13 years                            | 82 (38.7)    | 129 (43.6)  | 62 (33.3)   | 13 (31.0)    |
| ≥ 14 years                             | 90 (42.5)    | 131 (44.3)  | 91 (48.9)   | 23 (54.8)    |
| <b>Age at VI onset (mean, SD)</b>      | 26.9 (25.8)  | 22.0 (18.3) | 10.1 (16.2) | 32.6 (21.6)  |
| <b>Cause of VI (n, %):</b> Disease     | 124 (58.5)   | 147 (49.7)  | 69 (37.1)   | 29 (69.0)    |
| Trauma/injury                          | 11 (5.2)     | 15 (5.1)    | 21 (11.3)   | 7 (16.7)     |
| Prenatal/postnatal causes              | 77 (36.3)    | 134 (45.3)  | 96 (51.6)   | 6 (14.3)     |
| <b>VI stability (n, %):</b> Congenital | 77 (36.3)    | 134 (45.3)  | 96 (51.6)   | 6 (14.3)     |
| Acquired, progressive                  | 80 (37.7)    | 103 (34.8)  | 52 (28.0)   | 20 (47.6)    |
| Acquired, sudden                       | 55 (25.9)    | 59 (19.9)   | 38 (20.4)   | 16 (38.1)    |
| <b>Access VI equipment (n, %):</b> No  | 132 (62.3)   | 83 (28.0)   | 1 (0.5)     | 31 (73.8)    |
| Yes                                    | 80 (37.7)    | 213 (72.0)  | 185 (99.5)  | 11 (26.2)    |
| <b>Other impairments (n, %):</b> No    | 137 (64.6)   | 195 (65.9)  | 121 (65.0)  | 25 (59.5)    |
| Yes                                    | 75 (35.4)    | 101 (34.1)  | 65 (35.0)   | 17 (40.5)    |

*Notes.* VI = visual impairment; SD = standard deviation;

# = Statistical significance determined either through ANOVA or Person's Chi-squared test. We found significant differences across VI severities with regard to mean age (F: 5.8,  $p < 0.001$ ), mean age at VI onset (F: 24.7,  $p < 0.001$ ), VI stability ( $\chi^2$ : 25.7,  $p < 0.001$ ), cause of VI ( $\chi^2$ : 14.2,  $p = 0.002$ ), and access to VI equipment ( $\chi^2$ : 203.9,  $p < 0.001$ ). No significant differences were observed for gender ( $\chi^2$ : 6.2,  $p = 0.10$ ), education ( $\chi^2$ : 9.9,  $p = 0.13$ ), and having other impairments ( $\chi^2$ : 0.7,  $p = 0.88$ ).



**STROBE 2007 (v4) checklist of items to be included in reports of observational studies in epidemiology\***  
**Checklist for cohort, case-control, and cross-sectional studies (combined)**

| Section/Topic        | Item # | Recommendation                                                                                                       | Reported on page #                                                                                                                                                                                                                                                                                                                                                                                                             |
|----------------------|--------|----------------------------------------------------------------------------------------------------------------------|--------------------------------------------------------------------------------------------------------------------------------------------------------------------------------------------------------------------------------------------------------------------------------------------------------------------------------------------------------------------------------------------------------------------------------|
| Title and abstract   | 1      | (a) Indicate the study's design with a commonly used term in the title or the abstract                               | Page 1                                                                                                                                                                                                                                                                                                                                                                                                                         |
|                      |        | (b) Provide in the abstract an informative and balanced summary of what was done and what was found                  | Page 2                                                                                                                                                                                                                                                                                                                                                                                                                         |
| <b>Introduction</b>  |        |                                                                                                                      |                                                                                                                                                                                                                                                                                                                                                                                                                                |
| Background/rationale | 2      | Explain the scientific background and rationale for the investigation being reported                                 | Page 4                                                                                                                                                                                                                                                                                                                                                                                                                         |
| Objectives           | 3      | State specific objectives, including any pre-specified hypotheses                                                    | Page 5                                                                                                                                                                                                                                                                                                                                                                                                                         |
| <b>Methods</b>       |        |                                                                                                                      |                                                                                                                                                                                                                                                                                                                                                                                                                                |
| Study design         | 4      | Present key elements of study design early in the paper                                                              | <p><b>VI population</b><br/>           "This cross-sectional study included a probability sample of adults with VI (<math>\geq 18</math> years)", Page 5</p> <p><b>General population</b><br/>           "Norm data were based on the Norwegian Population Study (NorPop), a cross-sectional survey including a representative sample of adults (<math>\geq 18</math> years) from the general Norwegian population" Page 5</p> |
| Setting              | 5      | Describe the setting, locations, and relevant dates, including periods of recruitment, exposure, follow-up, and data | <b>VI population</b>                                                                                                                                                                                                                                                                                                                                                                                                           |

1  
2  
3  
4  
5  
6  
7  
8  
9  
10  
11  
12  
13  
14  
15  
16  
17  
18  
19  
20  
21  
22  
23  
24  
25  
26  
27  
28  
29  
30  
31  
32  
33  
34  
35  
36  
37  
38  
39  
40  
41  
42  
43  
44  
45  
46  
47

|              |   |                                                                                                                                                                                                                                                                                                                                                                                                                                                                                    |                                                                                                                                                                                                                                                                                                                 |
|--------------|---|------------------------------------------------------------------------------------------------------------------------------------------------------------------------------------------------------------------------------------------------------------------------------------------------------------------------------------------------------------------------------------------------------------------------------------------------------------------------------------|-----------------------------------------------------------------------------------------------------------------------------------------------------------------------------------------------------------------------------------------------------------------------------------------------------------------|
|              |   | collection                                                                                                                                                                                                                                                                                                                                                                                                                                                                         | <p>“Data were collected through structured telephone interviews by a survey company in the period between February 1 and May 31, 2017”, page 5</p> <p><b>General population</b><br/>“The study data were collected by postal questionnaires in the period between 2014 and 2015.” Page 5 and 6</p>              |
| Participants | 6 | <p>(a) <i>Cohort study</i>—Give the eligibility criteria, and the sources and methods of selection of participants. Describe methods of follow-up</p> <p><i>Case-control study</i>—Give the eligibility criteria, and the sources and methods of case ascertainment and control selection. Give the rationale for the choice of cases and controls</p> <p><i>Cross-sectional study</i>—Give the eligibility criteria, and the sources and methods of selection of participants</p> | <p><b>VI population</b><br/>“This cross-sectional study included a probability sample of adults with VI (≥ 18 years) who were members of the Norwegian Association of the Blind and Partially Sighted.” Page 5</p> <p>“To ensure adequate number of participants in the younger age groups, a simple random</p> |

1  
2  
3  
4  
5  
6  
7  
8  
9  
10  
11  
12  
13  
14  
15  
16  
17  
18  
19  
20  
21  
22  
23  
24  
25  
26  
27  
28  
29  
30  
31  
32  
33  
34  
35  
36  
37  
38  
39  
40  
41  
42  
43  
44  
45  
46  
47

For peer review only

|  |                                                                                                                                                                                                                              |                                                                                                                                                                                                                                                                                                                                                                                                                                                                                                                       |
|--|------------------------------------------------------------------------------------------------------------------------------------------------------------------------------------------------------------------------------|-----------------------------------------------------------------------------------------------------------------------------------------------------------------------------------------------------------------------------------------------------------------------------------------------------------------------------------------------------------------------------------------------------------------------------------------------------------------------------------------------------------------------|
|  |                                                                                                                                                                                                                              | <p>sampling was used within each of the following four age strata: 18–35, 36–50, 51–65, and ≥ 66.” Page 5</p> <p><b>General population</b><br/>“a representative sample of adults (≥ 18 years) from the general Norwegian population” Page 6</p> <p>“Simple random sampling was conducted based on names and addresses from the Central National Register of Norway, and effort was made to ensure that the sample reflected the Norwegian population in terms of age, gender, and geographical location.” Page 6</p> |
|  | <p>(b) <i>Cohort study</i>—For matched studies, give matching criteria and number of exposed and unexposed<br/><i>Case-control study</i>—For matched studies, give matching criteria and the number of controls per case</p> |                                                                                                                                                                                                                                                                                                                                                                                                                                                                                                                       |

1  
2  
3  
4  
5  
6  
7  
8  
9  
10  
11  
12  
13  
14  
15  
16  
17  
18  
19  
20  
21  
22  
23  
24  
25  
26  
27  
28  
29  
30  
31  
32  
33  
34  
35  
36  
37  
38  
39  
40  
41  
42  
43  
44  
45  
46  
47

|                           |    |                                                                                                                                                                                      |                                                                                                                                                                                                                                                                                         |
|---------------------------|----|--------------------------------------------------------------------------------------------------------------------------------------------------------------------------------------|-----------------------------------------------------------------------------------------------------------------------------------------------------------------------------------------------------------------------------------------------------------------------------------------|
| Variables                 | 7  | Clearly define all outcomes, exposures, predictors, potential confounders, and effect modifiers. Give diagnostic criteria, if applicable                                             | Page 6, 7 and 8                                                                                                                                                                                                                                                                         |
| Data sources/ measurement | 8* | For each variable of interest, give sources of data and details of methods of assessment (measurement). Describe comparability of assessment methods if there is more than one group | Page 6 and 7                                                                                                                                                                                                                                                                            |
| Bias                      | 9  | Describe any efforts to address potential sources of bias                                                                                                                            | <p>“The models were either unadjusted or age- and gender-adjusted.” Page 8</p> <p>“The GLMs were either unadjusted or adjusted for age, gender, education, and VI severity.” Page 8</p>                                                                                                 |
| Study size                | 10 | Explain how the study size was arrived at                                                                                                                                            | This study was about coping with trauma and mental health in individuals with visual impairment. Sample size was calculated with regard to the number of participants needed to examine the prevalence and consequences of trauma-related outcomes like post-traumatic stress disorder. |
| Quantitative variables    | 11 | Explain how quantitative variables were handled in the analyses. If applicable, describe which groupings were chosen                                                                 | Page 8                                                                                                                                                                                                                                                                                  |

|                     |     |                                                                                                                                                                                                                                                                                                           |                                                                                                                                                                                 |
|---------------------|-----|-----------------------------------------------------------------------------------------------------------------------------------------------------------------------------------------------------------------------------------------------------------------------------------------------------------|---------------------------------------------------------------------------------------------------------------------------------------------------------------------------------|
|                     |     | and why                                                                                                                                                                                                                                                                                                   |                                                                                                                                                                                 |
| Statistical methods | 12  | (a) Describe all statistical methods, including those used to control for confounding                                                                                                                                                                                                                     | Page 8                                                                                                                                                                          |
|                     |     | (b) Describe any methods used to examine subgroups and interactions                                                                                                                                                                                                                                       | Page 8                                                                                                                                                                          |
|                     |     | (c) Explain how missing data were addressed                                                                                                                                                                                                                                                               | We were not able to address the possible impact of missing data. However, on page 13, we described our sample in its relation to census data of people with visual impairments. |
|                     |     | (d) <i>Cohort study</i> —If applicable, explain how loss to follow-up was addressed<br><i>Case-control study</i> —If applicable, explain how matching of cases and controls was addressed<br><i>Cross-sectional study</i> —If applicable, describe analytical methods taking account of sampling strategy | —                                                                                                                                                                               |
|                     |     | (e) Describe any sensitivity analyses                                                                                                                                                                                                                                                                     | —                                                                                                                                                                               |
| <b>Results</b>      |     |                                                                                                                                                                                                                                                                                                           |                                                                                                                                                                                 |
| Participants        | 13* | (a) Report numbers of individuals at each stage of study—eg numbers potentially eligible, examined for eligibility, confirmed eligible, included in the study, completing follow-up, and analysed                                                                                                         | Page 5                                                                                                                                                                          |
|                     |     | (b) Give reasons for non-participation at each stage                                                                                                                                                                                                                                                      | Supplementary material, Figure S1                                                                                                                                               |
|                     |     | (c) Consider use of a flow diagram                                                                                                                                                                                                                                                                        | Supplementary material, Figure S1                                                                                                                                               |
| Descriptive data    | 14* | (a) Give characteristics of study participants (eg demographic, clinical, social) and information on exposures and potential confounders                                                                                                                                                                  | Page 10 and Supplementary, Table S1                                                                                                                                             |
|                     |     | (b) Indicate number of participants with missing data for each variable of interest                                                                                                                                                                                                                       | We had no missing data due to non-response                                                                                                                                      |
|                     |     | (c) <i>Cohort study</i> —Summarise follow-up time (eg, average and total amount)                                                                                                                                                                                                                          |                                                                                                                                                                                 |

1  
2  
3  
4  
5  
6  
7  
8  
9  
10  
11  
12  
13  
14  
15  
16  
17  
18  
19  
20  
21  
22  
23  
24  
25  
26  
27  
28  
29  
30  
31  
32  
33  
34  
35  
36  
37  
38  
39  
40  
41  
42  
43  
44  
45  
46  
47

|                |     |                                                                                                                                                                                                              |                                                                                                                                                                                                                                               |
|----------------|-----|--------------------------------------------------------------------------------------------------------------------------------------------------------------------------------------------------------------|-----------------------------------------------------------------------------------------------------------------------------------------------------------------------------------------------------------------------------------------------|
| Outcome data   | 15* | <i>Cohort study</i> —Report numbers of outcome events or summary measures over time                                                                                                                          |                                                                                                                                                                                                                                               |
|                |     | <i>Case-control study</i> —Report numbers in each exposure category, or summary measures of exposure                                                                                                         |                                                                                                                                                                                                                                               |
|                |     | <i>Cross-sectional study</i> —Report numbers of outcome events or summary measures                                                                                                                           | Table 2 and page 12                                                                                                                                                                                                                           |
| Main results   | 16  | (a) Give unadjusted estimates and, if applicable, confounder-adjusted estimates and their precision (eg, 95% confidence interval). Make clear which confounders were adjusted for and why they were included | Page 11 and 12                                                                                                                                                                                                                                |
|                |     | (b) Report category boundaries when continuous variables were categorized                                                                                                                                    | “The GLMs were either unadjusted or adjusted for age (years: 18–35, 36–50, 51–65, ≥ 66), gender, education (years: < 11, 11-13, ≥ 14), and VI severity (moderate VI, severe VI, blindness, undetermined VI).”<br>Page 8                       |
|                |     | (c) If relevant, consider translating estimates of relative risk into absolute risk for a meaningful time period                                                                                             | —                                                                                                                                                                                                                                             |
| Other analyses | 17  | Report other analyses done—eg analyses of subgroups and interactions, and sensitivity analyses                                                                                                               | No risk ratio modifications were observed of age or gender with each of the VI-specific factors (p > 0.05).<br><br>“No risk ratio modifications were found of sexual assault with each of the possible confounding factors, neither for self- |

1  
2  
3  
4  
5  
6  
7  
8  
9  
10  
11  
12  
13  
14  
15  
16  
17  
18  
19  
20  
21  
22  
23  
24  
25  
26  
27  
28  
29  
30  
31  
32  
33  
34  
35  
36  
37  
38  
39  
40  
41  
42  
43  
44  
45  
46  
47

|                   |    |                                                          |                                                                                                                                                                                                                                                                                                                                                                                                                                                                                                                                                                         |
|-------------------|----|----------------------------------------------------------|-------------------------------------------------------------------------------------------------------------------------------------------------------------------------------------------------------------------------------------------------------------------------------------------------------------------------------------------------------------------------------------------------------------------------------------------------------------------------------------------------------------------------------------------------------------------------|
|                   |    |                                                          | efficacy nor life satisfaction (p > 0.05)." Page 8                                                                                                                                                                                                                                                                                                                                                                                                                                                                                                                      |
| <b>Discussion</b> |    |                                                          |                                                                                                                                                                                                                                                                                                                                                                                                                                                                                                                                                                         |
| Key results       | 18 | Summarise key results with reference to study objectives | <p>"The results from this cross-sectional study showed a higher prevalence of people in the VI population being exposed to sexual assaults such as being raped and forced into sexual acts compared to that in the general population, reaching statistical significance for women only. In the population of people with VI, the risk of sexual assaults was particularly high among individuals having other impairments in addition to their vision loss. Lastly, individuals with VI who had been assaulted sexually had lower levels of self-efficacy and life</p> |

For peer review only

1  
2  
3  
4  
5  
6  
7  
8  
9  
10  
11  
12  
13  
14  
15  
16  
17  
18  
19  
20  
21  
22  
23  
24  
25  
26  
27  
28  
29  
30  
31  
32  
33  
34  
35  
36  
37  
38  
39  
40  
41  
42  
43  
44  
45  
46  
47

|                          |    |                                                                                                                                                                            |                                                                             |
|--------------------------|----|----------------------------------------------------------------------------------------------------------------------------------------------------------------------------|-----------------------------------------------------------------------------|
|                          |    |                                                                                                                                                                            | satisfaction compared with the reference of no sexual assaults.”<br>Page 12 |
| Limitations              | 19 | Discuss limitations of the study, taking into account sources of potential bias or imprecision. Discuss both direction and magnitude of any potential bias                 | Page 12 and 13                                                              |
| Interpretation           | 20 | Give a cautious overall interpretation of results considering objectives, limitations, multiplicity of analyses, results from similar studies, and other relevant evidence | Page 2                                                                      |
| Generalisability         | 21 | Discuss the generalisability (external validity) of the study results                                                                                                      | Page 13                                                                     |
| <b>Other information</b> |    |                                                                                                                                                                            |                                                                             |
| Funding                  | 22 | Give the source of funding and the role of the funders for the present study and, if applicable, for the original study on which the present article is based              | Page 17                                                                     |

\*Give information separately for cases and controls in case-control studies and, if applicable, for exposed and unexposed groups in cohort and cross-sectional studies.  
**Note:** An Explanation and Elaboration article discusses each checklist item and gives methodological background and published examples of transparent reporting. The STROBE checklist is best used in conjunction with this article (freely available on the Web sites of PLoS Medicine at <http://www.plosmedicine.org/>, Annals of Internal Medicine at <http://www.annals.org/>, and Epidemiology at <http://www.epidem.com/>). Information on the STROBE Initiative is available at [www.strobe-statement.org](http://www.strobe-statement.org).
