# Supplementary material for: Sexual assaults in individuals with visual impairment: a cross-sectional study of a Norwegian sample
Source: PubMed Central journal article supplement — BMJ Open. 2018 Jun 9;8(6):e021602. doi: 10.1136/bmjopen-2018-021602 (PMC6009623; doi:10.1136/bmjopen-2018-021602), 2018-06-09
Supplement: bmjopen-2018-021602supp002.pdf [file bmjopen-2018-021602supp002.pdf]

**Table S1.** Study characteristics and VI-specific factors of the VI population, according to various degrees of vision loss (n = 736).

| Characteristics                        | VI severity# |             |             |              |
|----------------------------------------|--------------|-------------|-------------|--------------|
|                                        | Moderate VI  | Severe VI   | Blindness   | Undetermined |
| <b>Age (mean, SD)</b>                  | 53.6 (17.4)  | 48.3 (16.8) | 53.2 (16.7) | 54.9 (17.0)  |
| <b>Gender (n, %):</b> Women            | 130 (61.3)   | 152 (51.4)  | 96 (51.6)   | 25 (59.5)    |
| Men                                    | 82 (38.7)    | 144 (48.6)  | 90 (48.4)   | 17 (40.5)    |
| <b>Education (n, %):</b> < 11 years    | 40 (18.9)    | 36 (12.2)   | 33 (17.7)   | 6 (14.3)     |
| 11–13 years                            | 82 (38.7)    | 129 (43.6)  | 62 (33.3)   | 13 (31.0)    |
| ≥ 14 years                             | 90 (42.5)    | 131 (44.3)  | 91 (48.9)   | 23 (54.8)    |
| <b>Age at VI onset (mean, SD)</b>      | 26.9 (25.8)  | 22.0 (18.3) | 10.1 (16.2) | 32.6 (21.6)  |
| <b>Cause of VI (n, %):</b> Disease     | 124 (58.5)   | 147 (49.7)  | 69 (37.1)   | 29 (69.0)    |
| Trauma/injury                          | 11 (5.2)     | 15 (5.1)    | 21 (11.3)   | 7 (16.7)     |
| Prenatal/postnatal causes              | 77 (36.3)    | 134 (45.3)  | 96 (51.6)   | 6 (14.3)     |
| <b>VI stability (n, %):</b> Congenital | 77 (36.3)    | 134 (45.3)  | 96 (51.6)   | 6 (14.3)     |
| Acquired, progressive                  | 80 (37.7)    | 103 (34.8)  | 52 (28.0)   | 20 (47.6)    |
| Acquired, sudden                       | 55 (25.9)    | 59 (19.9)   | 38 (20.4)   | 16 (38.1)    |
| <b>Access VI equipment (n, %):</b> No  | 132 (62.3)   | 83 (28.0)   | 1 (0.5)     | 31 (73.8)    |
| Yes                                    | 80 (37.7)    | 213 (72.0)  | 185 (99.5)  | 11 (26.2)    |
| <b>Other impairments (n, %):</b> No    | 137 (64.6)   | 195 (65.9)  | 121 (65.0)  | 25 (59.5)    |
| Yes                                    | 75 (35.4)    | 101 (34.1)  | 65 (35.0)   | 17 (40.5)    |

*Notes.* VI = visual impairment; SD = standard deviation;

# = Statistical significance determined either through ANOVA or Person's Chi-squared test. We found significant differences across VI severities with regard to mean age (F: 5.8,  $p < 0.001$ ), mean age at VI onset (F: 24.7,  $p < 0.001$ ), VI stability ( $\chi^2$ : 25.7,  $p < 0.001$ ), cause of VI ( $\chi^2$ : 14.2,  $p = 0.002$ ), and access to VI equipment ( $\chi^2$ : 203.9,  $p < 0.001$ ). No significant differences were observed for gender ( $\chi^2$ : 6.2,  $p = 0.10$ ), education ( $\chi^2$ : 9.9,  $p = 0.13$ ), and having other impairments ( $\chi^2$ : 0.7,  $p = 0.88$ ).
