# Supplementary figures and images for: Sexual assaults in individuals with visual impairment: a cross-sectional study of a Norwegian sample
Source: PubMed Central journal article supplement — BMJ Open. 2018 Jun 9;8(6):e021602. doi: 10.1136/bmjopen-2018-021602 (PMC6009623; doi:10.1136/bmjopen-2018-021602), 2018-06-09

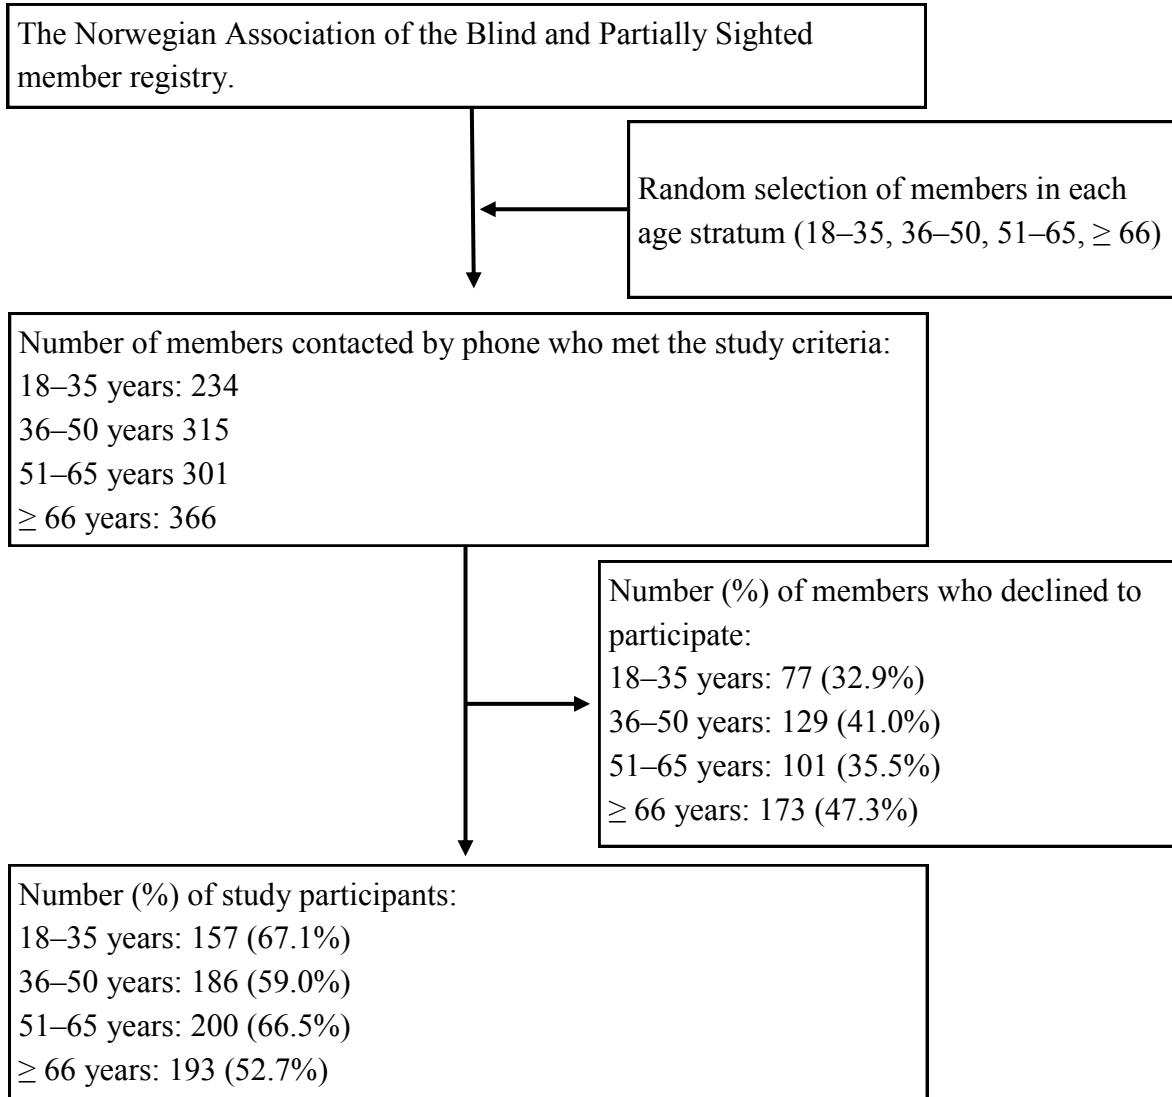

**Figure S1.** Selection of study participants.

Supplement: bmjopen-2018-021602supp001.pdf [file bmjopen-2018-021602supp001.pdf]
